# Supplementary material
Source: publisher figshare collection journal article supplement (https://tandf.figshare.com/ndownloader/files/33158095)
Supplement: Supplementary file 1 [file 33158095]

Table S2: Details of DE miRNAs and DEmRNAs between undifferentiated and differentiated preadipocytes

DE miRNAs

| id | P0-1_TPM | P0-2_TPM | P0-3_TPM | P6-1_TPM | P6-2_TPM | P6-3_TPM | log2(fc) | PValue |
| --- | --- | --- | --- | --- | --- | --- | --- | --- |
| gga-miR-12207-5p | 0.7755 | 0.1769 | 0.2493 | 0 | 0 | 0 | -5.32397 | 0.015533 |
| gga-miR-12273-3p | 0 | 13.2662 | 49.2373 | 4.2742 | 3.2972 | 0.1403 | -3.01882 | 0.036106 |
| gga-miR-12273-5p | 0.7755 | 6.5447 | 18.5731 | 2.5142 | 3.0166 | 0.3506 | -2.13835 | 0.02754 |
| gga-miR-12277-5p | 0.5428 | 0.796 | 1.4958 | 0 | 0 | 0 | -6.56204 | 3.17E-05 |
| gga-miR-128-1-5p | 6.7464 | 8.8442 | 13.587 | 4.6094 | 3.8584 | 5.2596 | -1.0878 | 0.022222 |
| gga-miR-135a-5p | 3.2569 | 3.7145 | 7.853 | 2.598 | 2.3151 | 1.613 | -1.18368 | 0.035816 |
| gga-miR-138-1-3p | 0 | 0.3538 | 0.2493 | 1.0057 | 0.7717 | 1.1221 | 2.265335 | 0.006448 |
| gga-miR-1416-5p | 1.3183 | 1.4151 | 6.3572 | 9.5541 | 8.9095 | 9.6778 | 1.630247 | 0.001508 |
| gga-miR-142-3p | 0 | 0 | 0 | 1.2571 | 1.6135 | 0.6312 | 6.86699 | 1.09E-06 |
| gga-miR-142-5p | 0 | 0 | 2.7423 | 9.9731 | 8.4885 | 8.2752 | 3.285368 | 0.000839 |
| gga-miR-1456-3p | 1.3958 | 1.2382 | 3.9888 | 1.1733 | 0.4911 | 0.561 | -1.57338 | 0.02992 |
| gga-miR-1456-5p | 84.1367 | 67.1272 | 299.288 | 25.2262 | 25.3955 | 26.8593 | -2.53978 | 2.92E-06 |
| gga-miR-146a-3p | 10.0809 | 10.4361 | 59.0848 | 97.5524 | 92.8829 | 123.0057 | 1.977321 | 0.000175 |
| gga-miR-146a-5p | 65.0606 | 51.6499 | 190.0934 | 721.0831 | 596.0923 | 684.3856 | 2.705737 | 2.78E-09 |
| gga-miR-146b-3p | 145.0874 | 127.2675 | 113.3081 | 960.3547 | 1039.25 | 1054.034 | 2.985117 | 1.20E-14 |
| gga-miR-146b-5p | 3576.781 | 2925.472 | 2389.068 | 21338.58 | 23166.29 | 24036.18 | 2.946499 | 1.40E-13 |
| gga-miR-155 | 0.1551 | 0.4422 | 0 | 1.76 | 1.6837 | 1.8233 | 3.140454 | 5.68E-05 |
| gga-miR-15c-3p | 13.8031 | 15.4773 | 28.7945 | 9.3865 | 7.9273 | 7.9947 | -1.19829 | 0.007325 |
| gga-miR-1604 | 0.1551 | 0.1769 | 0.2493 | 0.6705 | 0.912 | 1.0519 | 2.18012 | 0.008036 |
| gga-miR-1618-5p | 0 | 0 | 0.8726 | 2.0952 | 2.3852 | 3.0155 | 3.102709 | 6.86E-05 |
| gga-miR-1625-5p | 4.3425 | 5.5718 | 4.3628 | 9.9731 | 12.2067 | 8.4154 | 1.099602 | 0.007185 |
| gga-miR-1663-3p | 39.5481 | 129.6554 | 214.0264 | 63.3588 | 46.6519 | 60.2405 | -1.17055 | 0.035808 |
| gga-miR-1663-5p | 0.1551 | 0 | 0 | 7.5427 | 4.7003 | 6.1713 | 6.891484 | 1.74E-16 |
| gga-miR-1682 | 0 | 0 | 1.3712 | 1.76 | 2.6658 | 4.5584 | 2.711951 | 0.002609 |
| gga-miR-1684a-3p | 0.1551 | 0.4422 | 8.8502 | 16.1749 | 13.6097 | 16.7607 | 2.300631 | 0.005702 |
| gga-miR-1684b-3p | 10.7788 | 9.2864 | 4.4874 | 23.131 | 22.449 | 28.6826 | 1.59676 | 0.000527 |
| gga-miR-1724 | 0 | 0 | 0 | 0.5867 | 0 | 0.7013 | 5.424026 | 0.023677 |
| gga-miR-1754-5p | 0.3877 | 0.5306 | 1.4958 | 1.5924 | 1.5434 | 2.174 | 1.137172 | 0.036639 |
| gga-miR-1798-3p | 0 | 0 | 0 | 0.3352 | 0.7015 | 0.8415 | 5.968244 | 0.00046 |
| gga-miR-1798-5p | 0 | 0 | 0.2493 | 1.76 | 2.1046 | 1.2623 | 4.362132 | 7.99E-07 |
| gga-miR-1805-3p | 0 | 0 | 0.374 | 13.8283 | 11.5753 | 14.6569 | 6.742998 | 4.49E-23 |
| gga-miR-1805-5p | 0 | 0 | 0 | 0.1676 | 0.5612 | 1.3324 | 6.102378 | 0.000906 |
| gga-miR-184-3p | 302.1944 | 251.0858 | 46.495 | 478.124 | 406.7486 | 637.0487 | 1.3434 | 0.023234 |
| gga-miR-193b-5p | 0.5428 | 0.3538 | 0.6233 | 0 | 0 | 0 | -5.66287 | 0.00245 |
| gga-miR-1b-3p | 1.2407 | 0.5306 | 0.374 | 3.1847 | 4.2793 | 2.4545 | 2.208943 | 0.000302 |
| gga-miR-200a-3p | 0.3102 | 0 | 0 | 0.3352 | 1.1926 | 0.4208 | 2.651167 | 0.045436 |
| gga-miR-203a | 0 | 0.1769 | 0 | 3.4361 | 4.7704 | 8.2051 | 6.535638 | 3.97E-13 |
| gga-miR-20b-3p | 1.0081 | 2.0342 | 1.4958 | 4.4418 | 2.3151 | 3.0155 | 1.106625 | 0.032463 |
| gga-miR-222b-3p | 0 | 0 | 0 | 1.0057 | 0.4209 | 0.7013 | 6.148324 | 0.000162 |
| gga-miR-222b-5p | 0 | 0 | 0 | 1.1733 | 0.1403 | 0.4208 | 5.85333 | 0.003219 |
| gga-miR-223 | 1.2407 | 0.796 | 2.867 | 5.1123 | 5.6123 | 6.7324 | 1.831863 | 0.000224 |
| gga-miR-429-3p | 1.0856 | 0.1769 | 0.2493 | 15.6721 | 15.6442 | 22.371 | 5.150242 | 1.69E-16 |
| gga-miR-460a-5p | 2.7916 | 3.6261 | 0.8726 | 10.476 | 7.2959 | 8.3453 | 1.84095 | 0.00108 |
| gga-miR-6549-5p | 0.4653 | 1.0613 | 0 | 2.2628 | 2.5255 | 1.4727 | 2.036071 | 0.008242 |
| gga-miR-6557-3p | 1.7835 | 3.8914 | 5.734 | 1.2571 | 0.4209 | 0.4909 | -2.39512 | 0.000365 |
| gga-miR-6557-5p | 0.4653 | 1.7688 | 3.7395 | 0.5867 | 0 | 0 | -3.34791 | 0.003518 |
| gga-miR-6575-5p | 0.6204 | 0.1769 | 0.374 | 0 | 0 | 0 | -5.287 | 0.013159 |
| gga-miR-6582-5p | 7.1342 | 5.5718 | 15.3321 | 1.0057 | 0.4911 | 0.9818 | -3.49979 | 4.03E-09 |
| gga-miR-6586-5p | 0.2326 | 0.1769 | 1.2465 | 2.0114 | 1.9643 | 1.613 | 1.75481 | 0.004707 |
| gga-miR-6604-5p | 0 | 0 | 0 | 1.0895 | 1.4031 | 0.9818 | 6.855658 | 2.90E-07 |
| gga-miR-6606-5p | 34.12 | 28.3013 | 119.1667 | 12.4036 | 13.0485 | 20.3373 | -1.98758 | 0.000402 |
| gga-miR-6615-3p | 4.9629 | 5.4834 | 9.3489 | 20.3653 | 21.2564 | 22.5814 | 1.697492 | 6.85E-06 |
| gga-miR-6615-5p | 0.7755 | 0.6191 | 0.374 | 2.0114 | 2.8763 | 2.5246 | 2.067313 | 0.000322 |
| gga-miR-6675-3p | 0 | 0 | 0 | 0.419 | 0.5612 | 0.8415 | 5.924179 | 0.000506 |
| gga-miR-6694-3p | 5.5057 | 7.9597 | 7.4791 | 2.8495 | 3.5077 | 3.5766 | -1.07615 | 0.023755 |
| miR-10400-x | 0.6979 | 2.0342 | 11.8419 | 0.6705 | 1.6135 | 1.7532 | -1.85197 | 0.045905 |
| miR-10926-x | 6.3587 | 9.7286 | 40.0131 | 3.6875 | 4.6301 | 10.1687 | -1.60155 | 0.022447 |
| miR-10955-y | 117.4037 | 160.2562 | 488.2595 | 71.5719 | 65.6635 | 185.4202 | -1.2472 | 0.043366 |
| miR-11202-x | 7.677 | 15.7426 | 292.1828 | 9.3865 | 8.699 | 21.5295 | -2.99399 | 0.003694 |
| miR-12135-y | 1.5509 | 2.211 | 8.4763 | 1.1733 | 1.1225 | 1.9636 | -1.52267 | 0.039647 |
| miR-12223-y | 0.6204 | 1.7688 | 1.6205 | 0.419 | 0.6314 | 0.2104 | -1.66915 | 0.028327 |
| miR-12273-y | 0 | 0.6191 | 4.8614 | 0.419 | 0.2806 | 0 | -2.96971 | 0.042057 |
| miR-12295-x | 1.9386 | 1.5919 | 3.9888 | 0.8381 | 0.912 | 1.0519 | -1.42414 | 0.018671 |
| miR-132-y | 0.6979 | 0.796 | 0 | 1.1733 | 2.4554 | 1.0519 | 1.64761 | 0.049191 |
| miR-1386-x | 32.8792 | 51.1193 | 385.9207 | 17.2644 | 17.2577 | 35.0643 | -2.75554 | 0.000415 |
| miR-141-y | 0 | 0 | 0 | 0 | 1.0523 | 0.7714 | 5.925762 | 0.006819 |
| miR-1456-x | 2.9467 | 2.7417 | 6.2326 | 1.0057 | 1.6135 | 1.0519 | -1.69922 | 0.003069 |
| miR-146-y | 40.8664 | 35.4651 | 25.1796 | 93.6134 | 103.0551 | 90.3958 | 1.499736 | 0.000126 |
| miR-151-x | 0 | 0 | 0 | 0.6705 | 2.6658 | 0.7714 | 7.097225 | 1.75E-06 |
| miR-1568-y | 0 | 0 | 0 | 0.6705 | 0.2806 | 0.1403 | 5.185074 | 0.01915 |
| miR-1599-y | 0.4653 | 0.2653 | 1.7451 | 0 | 0 | 0.3506 | -2.81994 | 0.045919 |
| miR-1648-x | 0 | 1.2382 | 0.7479 | 0 | 0 | 0 | -6.04883 | 0.008178 |
| miR-1663-y | 0.3877 | 1.7688 | 3.9888 | 0.3352 | 0.1403 | 0.6312 | -2.47322 | 0.0072 |
| miR-1664-y | 0 | 0.4422 | 0.2493 | 1.3409 | 0.9821 | 0.3506 | 1.950982 | 0.039034 |
| miR-1684-y | 0.1551 | 0 | 0 | 1.1733 | 1.6837 | 0 | 4.20323 | 0.009296 |
| miR-1747-x | 0.4653 | 0.4422 | 0.2493 | 1.6762 | 0.9821 | 0.7714 | 1.567943 | 0.02785 |
| miR-1805-y | 0 | 0 | 0 | 2.0114 | 0.7015 | 1.8233 | 7.240378 | 7.95E-08 |
| miR-192-x | 0.2326 | 1.0613 | 0.8726 | 1.5085 | 1.6837 | 2.5948 | 1.417449 | 0.017854 |
| miR-195-x | 0 | 0 | 0 | 0.1676 | 0.6314 | 0.1403 | 4.968552 | 0.031516 |
| miR-200-y | 0 | 0 | 0 | 0.1676 | 1.1926 | 0.1403 | 5.644337 | 0.009277 |
| miR-212-x | 0.6979 | 0.7075 | 0.374 | 1.4247 | 1.7538 | 1.1922 | 1.296473 | 0.041426 |
| miR-218-x | 3.6446 | 5.9256 | 6.2326 | 9.4703 | 13.0485 | 10.5193 | 1.063951 | 0.007031 |
| miR-223-y | 0 | 0 | 0 | 0.3352 | 1.1926 | 0.4208 | 6.021332 | 0.000644 |
| miR-23-x | 49.1638 | 38.9143 | 39.3898 | 20.7006 | 20.134 | 15.5686 | -1.17629 | 0.003567 |
| miR-2779-x | 2.4815 | 1.9457 | 6.1079 | 9.4703 | 5.8929 | 9.1167 | 1.216394 | 0.007057 |
| miR-2779-z | 29.855 | 61.29 | 593.7145 | 56.8218 | 41.0397 | 79.4558 | -1.94947 | 0.024479 |
| miR-28-x | 0 | 0 | 0 | 0.6705 | 2.4554 | 0.6312 | 6.968513 | 4.58E-06 |
| miR-28-y | 0 | 0 | 0 | 0.1676 | 0.6314 | 0.4208 | 5.345538 | 0.007686 |
| miR-301-y | 0.853 | 1.3266 | 1.8698 | 0.6705 | 0.5612 | 0.1403 | -1.56143 | 0.032925 |
| miR-374-x | 0 | 0 | 0 | 0.3352 | 0.4209 | 0.3506 | 5.205158 | 0.007379 |
| miR-3885-x | 0.4653 | 0 | 4.8614 | 0 | 0.1403 | 0.2805 | -3.66204 | 0.01836 |
| miR-3971-y | 4.9629 | 3.9799 | 4.3628 | 1.8438 | 1.8941 | 2.3844 | -1.11989 | 0.024687 |
| miR-4448-y | 0.6979 | 0.7075 | 11.5926 | 0.7543 | 0.3508 | 0.3506 | -3.1585 | 0.003461 |
| miR-4454-x | 107.7881 | 130.0976 | 682.4663 | 118.0853 | 83.763 | 154.7038 | -1.36807 | 0.038807 |
| miR-4508-x | 0.853 | 1.4151 | 2.7423 | 0 | 0.1403 | 0.4208 | -3.1586 | 0.000582 |
| miR-460-x | 0.1551 | 0 | 0 | 0.2514 | 0.5612 | 0.561 | 3.146691 | 0.0356 |
| miR-4940-x | 0.853 | 1.4151 | 11.9665 | 0.9219 | 0.6314 | 1.1221 | -2.41158 | 0.009166 |
| miR-516-x | 0 | 0 | 0 | 0.3352 | 0.8418 | 0.561 | 5.856322 | 0.000835 |
| miR-6238-y | 13.648 | 12.4703 | 276.6014 | 6.4532 | 5.8227 | 10.3089 | -3.74456 | 0.000124 |
| miR-6240-x | 106.78 | 261.5219 | 351.7662 | 63.9454 | 62.3662 | 90.0452 | -1.73472 | 0.000292 |
| miR-6412-y | 5.6608 | 8.3135 | 146.59 | 2.7657 | 3.7883 | 8.696 | -3.39627 | 0.000797 |
| miR-6557-y | 0.1551 | 0.5306 | 1.1219 | 0 | 0.1403 | 0 | -3.68749 | 0.031135 |
| miR-6606-x | 1.5509 | 0.796 | 6.1079 | 0.2514 | 0.1403 | 0.1403 | -3.99027 | 1.55E-05 |
| miR-6615-x | 0 | 0 | 0 | 0.419 | 0.2806 | 0.1403 | 4.807183 | 0.041587 |
| miR-6937-x | 0.2326 | 2.8301 | 8.3516 | 0 | 0.7015 | 0.8415 | -2.88703 | 0.012267 |
| miR-7192-x | 1.2407 | 0.5306 | 0.7479 | 0.1676 | 0.3508 | 0 | -2.28083 | 0.020991 |
| miR-726-y | 1.4734 | 1.9457 | 0.9972 | 3.0171 | 2.9464 | 4.1376 | 1.193602 | 0.022161 |
| miR-7550-x | 8.6851 | 17.1577 | 298.6647 | 10.0569 | 9.3304 | 22.9321 | -2.93886 | 0.003587 |
| miR-7977-x | 147.5689 | 187.4962 | 2927.438 | 90.0935 | 97.4429 | 246.1516 | -2.91125 | 0.001771 |
| miR-9226-x | 81.4227 | 124.4374 | 522.2893 | 100.7371 | 74.6431 | 89.8348 | -1.45707 | 0.018804 |
| miR-9226-y | 0.853 | 0.9729 | 4.7368 | 0.5867 | 0.1403 | 0.4909 | -2.42989 | 0.006561 |
| miR-9277-y | 36.2137 | 23.5255 | 83.5164 | 13.4931 | 15.2934 | 29.8047 | -1.28984 | 0.019185 |
| miR-9993-y | 31.3283 | 41.3907 | 254.7874 | 22.4605 | 20.3444 | 49.9316 | -1.82031 | 0.013049 |
| miR-9995-y | 25.6675 | 39.0912 | 499.4781 | 19.2758 | 18.6608 | 46.355 | -2.74284 | 0.002577 |
| novel-m0009-3p | 4.1099 | 5.0412 | 7.4791 | 2.6819 | 2.3151 | 2.2441 | -1.19952 | 0.016926 |
| novel-m0025-3p | 0 | 0 | 0 | 0.1676 | 0.4911 | 0.3506 | 5.072249 | 0.018442 |
| novel-m0037-5p | 0.853 | 0.2653 | 0 | 0 | 0 | 0 | -5.2202 | 0.038044 |
| novel-m0067-5p | 17.6803 | 26.1787 | 58.5861 | 16.0911 | 13.6097 | 15.7088 | -1.17378 | 0.019335 |
| novel-m0078-5p | 0 | 0 | 2.7423 | 0 | 0 | 0 | -6.51428 | 0.023652 |
| novel-m0080-3p | 0 | 0 | 0 | 0.5028 | 0.4911 | 0.4909 | 5.629162 | 0.001426 |
| novel-m0097-5p | 0.6204 | 0.8844 | 1.3712 | 0.2514 | 0.1403 | 0.1403 | -2.43457 | 0.00546 |
| novel-m0134-3p | 0 | 0 | 0 | 0.3352 | 0.3508 | 0.4208 | 5.205288 | 0.00741 |
| novel-m0137-5p | 1.8611 | 1.6804 | 3.1163 | 0.419 | 0.8418 | 0.9818 | -1.56987 | 0.010102 |
| novel-m0159-5p | 0 | 0 | 0 | 0.5028 | 1.0523 | 0.7714 | 6.277055 | 4.71E-05 |
| novel-m0161-3p | 0 | 0 | 0 | 5.8666 | 5.3316 | 4.4882 | 9.030336 | 5.61E-18 |
| novel-m0162-5p | 0 | 0 | 0 | 5.8666 | 5.3316 | 4.4882 | 9.030336 | 5.43E-18 |
| novel-m0165-3p | 1.3183 | 0.8844 | 1.7451 | 0.2514 | 0.4911 | 0.3506 | -1.85262 | 0.009082 |
| novel-m0184-3p | 0.6204 | 1.3266 | 15.9554 | 1.3409 | 1.4732 | 1.4026 | -2.08597 | 0.037429 |
| novel-m0185-5p | 0 | 0 | 0.2493 | 0.5867 | 0.2806 | 0.8415 | 2.777029 | 0.034805 |
| novel-m0188-5p | 0.3877 | 0.8844 | 0 | 0 | 0 | 0 | -5.40611 | 0.023605 |
| novel-m0197-3p | 1.6285 | 0.796 | 0.9972 | 0.1676 | 0.6314 | 0.2805 | -1.66435 | 0.036125 |
| novel-m0207-3p | 0 | 0 | 0 | 0.1676 | 1.5434 | 0.4208 | 6.150966 | 0.001048 |
| novel-m0209-3p | 0 | 0 | 0 | 0.2514 | 0.6314 | 0.1403 | 5.091841 | 0.019941 |
| novel-m0219-3p | 1.0856 | 0.3538 | 1.4958 | 0.1676 | 0 | 0.1403 | -3.25293 | 0.003697 |
| novel-m0222-5p | 0 | 0 | 0 | 1.76 | 1.6135 | 1.8935 | 7.455875 | 5.33E-10 |
| novel-m0228-3p | 0 | 0 | 0 | 0.6705 | 0.8418 | 0.7013 | 6.205288 | 5.38E-05 |
| novel-m0251-3p | 0 | 0 | 0.2493 | 0.8381 | 0.7015 | 0.3506 | 2.922584 | 0.017568 |
| novel-m0258-5p | 0 | 0 | 0 | 1.2571 | 0.7015 | 0.9818 | 6.614906 | 4.16E-06 |
| novel-m0270-5p | 0.1551 | 0.2653 | 3.2409 | 0 | 0 | 0 | -6.93125 | 0.000614 |
| novel-m0275-3p | 1.6285 | 1.8573 | 1.2465 | 0 | 0 | 0 | -7.30144 | 1.46E-08 |
| novel-m0281-5p | 0.2326 | 0 | 0 | 0.3352 | 0.4911 | 1.1922 | 3.117361 | 0.01722 |
| novel-m0289-5p | 1.0081 | 0.8844 | 0.8726 | 0 | 0 | 0 | -6.52623 | 1.30E-05 |
| novel-m0312-5p | 0.1551 | 0.1769 | 0.8726 | 3.0171 | 3.5077 | 2.9454 | 2.974841 | 8.42E-07 |
| novel-m0331-5p | 0 | 0 | 0 | 0.3352 | 0.4209 | 0.2104 | 5.009735 | 0.017955 |
| novel-m0338-5p | 0.853 | 0.3538 | 1.2465 | 0.1676 | 0 | 0.2104 | -2.69827 | 0.011374 |

DE mRNAs

| id | P0_count | P6_count | P0_fpkm | P6_fpkm | log2(FC) | Pvalue | Symbol |
| --- | --- | --- | --- | --- | --- | --- | --- |
| ENSGALT00000001110 | 3.076667 | 338.4333 | 0.053333 | 4.5 | 6.398744 | 1.28E-06 | VPS33B |
| ENSGALT00000001571 | 0 | 257.4867 | 0.001 | 4.25 | 12.05325 | 9.27E-12 | - |
| ENSGALT00000002157 | 599.6667 | 139 | 8.806667 | 1.8 | -2.2906 | 5.65E-06 | ADRA1B |
| ENSGALT00000002876 | 3477.11 | 1674.927 | 48.32667 | 20.16667 | -1.26085 | 6.95E-06 | C1QTNF12 |
| ENSGALT00000003446 | 228.3267 | 1065.873 | 1.693333 | 6.97 | 2.041293 | 8.19E-08 | PPL |
| ENSGALT00000003495 | 1336.153 | 322.43 | 11.19333 | 2.363333 | -2.24374 | 3.23E-10 | RERE |
| ENSGALT00000003964 | 243.7033 | 983.2633 | 3.876667 | 13.54333 | 1.804694 | 2.02E-05 | OLFM1 |
| ENSGALT00000003987 | 0 | 499.6433 | 0.001 | 4.206667 | 12.03846 | 6.96E-07 | SF3B3 |
| ENSGALT00000004041 | 517.75 | 1844.2 | 6.12 | 18.94 | 1.629833 | 1.26E-08 | GPR133 |
| ENSGALT00000004131 | 0 | 103.1 | 0.001 | 3.126667 | 11.61041 | 0.000416 | PCOLCE2 |
| ENSGALT00000004146 | 0 | 75.35667 | 0.001 | 2.56 | 11.32193 | 2.76E-05 | LRRC75A |
| ENSGALT00000004153 | 1114.667 | 3157 | 68.06333 | 170.27 | 1.322875 | 5.71E-08 | RBP7 |
| ENSGALT00000004375 | 5459 | 3065.333 | 245.1267 | 120.44 | -1.02521 | 7.06E-05 | CRIP1 |
| ENSGALT00000004694 | 0 | 49.67 | 0.001 | 0.553333 | 9.112005 | 0.000747 | ZNF341 |
| ENSGALT00000005192 | 4037.833 | 1815.013 | 67.00667 | 26.57667 | -1.33414 | 1.21E-05 | - |
| ENSGALT00000005264 | 12669.33 | 6340.333 | 265.7633 | 115.47 | -1.20262 | 3.14E-08 | PRRX1 |
| ENSGALT00000005391 | 293.5333 | 1438.843 | 1.9 | 8.113333 | 2.094295 | 9.88E-10 | SOGA1 |
| ENSGALT00000005663 | 177.4733 | 4355.053 | 0.88 | 21.65 | 4.62072 | 4.9E-08 | FN1 |
| ENSGALT00000005891 | 1992.39 | 1046.33 | 13.93667 | 6.41 | -1.12049 | 0.000112 | RAPGEF1 |
| ENSGALT00000006090 | 107.2767 | 0 | 1.13 | 0.001 | -10.1421 | 8.77E-07 | ADCY7 |
| ENSGALT00000007180 | 350.65 | 1070.583 | 5.636667 | 15.34667 | 1.445011 | 0.000357 | EYA2 |
| ENSGALT00000007764 | 555.3333 | 1870.667 | 12.86667 | 37.46667 | 1.541969 | 4.54E-08 | RASD1 |
| ENSGALT00000008121 | 0 | 210.69 | 0.001 | 2.866667 | 11.48516 | 6.42E-10 | PLA2G4A |
| ENSGALT00000008246 | 3689.13 | 9564.72 | 72.66667 | 164.7067 | 1.180533 | 1.38E-08 | SERPINE2 |
| ENSGALT00000008413 | 286.1667 | 828.6667 | 4.24 | 10.65333 | 1.329169 | 0.001182 | FGD3 |
| ENSGALT00000008904 | 526.3333 | 1463.333 | 15.23333 | 36.01 | 1.241166 | 0.000147 | DKK3 |
| ENSGALT00000009591 | 1286.167 | 105.13 | 23.56 | 1.773333 | -3.7318 | 0.000291 | SEC61A1 |
| ENSGALT00000010419 | 72.12667 | 510.8533 | 0.893333 | 5.55 | 2.635217 | 1.11E-05 | TF |
| ENSGALT00000010524 | 25249.95 | 13191.71 | 427.9033 | 196.0033 | -1.12641 | 7.52E-07 | HSPA8 |
| ENSGALT00000010764 | 0 | 79.35 | 0.001 | 0.8 | 9.643856 | 0.001257 | MAP3K13 |
| ENSGALT00000010788 | 2891.203 | 1204.14 | 42.97333 | 15.13 | -1.50603 | 2.65E-06 | PPP1R3C |
| ENSGALT00000010877 | 183.7767 | 0 | 4.256667 | 0.001 | -12.0555 | 0.001075 | - |
| ENSGALT00000010917 | 12.66667 | 332.0533 | 0.343333 | 7.92 | 4.527819 | 6.65E-08 | - |
| ENSGALT00000011524 | 1450.667 | 9216 | 45.17 | 262.3033 | 2.537799 | 1.35E-10 | APOA1 |
| ENSGALT00000011599 | 105.3133 | 532.15 | 0.54 | 2.42 | 2.163976 | 0.000913 | LRRK2 |
| ENSGALT00000011687 | 29217.67 | 79755.33 | 1328.007 | 3193.463 | 1.265859 | 2.53E-09 | FTH1 |
| ENSGALT00000011695 | 33.55667 | 557.5767 | 0.966667 | 14.11 | 3.867556 | 1.06E-09 | OSTN |
| ENSGALT00000011770 | 56.93 | 554.3767 | 0.563333 | 4.91 | 3.123662 | 5.09E-07 | - |
| ENSGALT00000011799 | 5.666667 | 237.2 | 0.083333 | 3.036667 | 5.187451 | 2.44E-06 | SYNPR |
| ENSGALT00000012164 | 126.21 | 735.0967 | 1.086667 | 5.493333 | 2.337772 | 1.43E-06 | - |
| ENSGALT00000012381 | 330 | 985.29 | 7.056667 | 19.17333 | 1.442042 | 0.000438 | SLC9A3R1 |
| ENSGALT00000013169 | 21.76667 | 377.0533 | 0.28 | 4.14 | 3.886132 | 2.93E-07 | PLCL1 |
| ENSGALT00000013444 | 2109.3 | 728.7067 | 24.16333 | 7.306667 | -1.72553 | 1.47E-09 | CNTN4 |
| ENSGALT00000013581 | 0 | 341.5933 | 0.001 | 3.85 | 11.91064 | 2.16E-06 | FURIN |
| ENSGALT00000013590 | 6502.377 | 3178.763 | 158.2433 | 68.34333 | -1.21127 | 8.83E-06 | LMCD1 |
| ENSGALT00000013645 | 0 | 153.4333 | 0.001 | 1.376667 | 10.42696 | 1.17E-06 | EIF2B5 |
| ENSGALT00000014329 | 1639.89 | 5558.227 | 17.36333 | 50.86667 | 1.550677 | 1.91E-11 | LRRN4 |
| ENSGALT00000014399 | 1415.787 | 623.8933 | 19.82333 | 7.453333 | -1.41124 | 3.76E-05 | FXR1 |
| ENSGALT00000015558 | 2016.987 | 1144.947 | 28.90333 | 14.17 | -1.0284 | 0.000226 | PRICKLE1 |
| ENSGALT00000015673 | 7866.76 | 4236.74 | 171.72 | 80.66333 | -1.09007 | 2.8E-07 | ACTB |
| ENSGALT00000015790 | 169.2867 | 612.0467 | 1.826667 | 5.776667 | 1.661024 | 0.001341 | PDK4 |
| ENSGALT00000016368 | 136.61 | 782.5433 | 1.923333 | 9.853333 | 2.357003 | 5.97E-05 | KCNK17 |
| ENSGALT00000016802 | 2568.63 | 1299.853 | 98.58667 | 43.86 | -1.16849 | 8.93E-06 | PAWR |
| ENSGALT00000017294 | 4462.977 | 12305.93 | 47.31667 | 115.6633 | 1.289511 | 3.7E-08 | ACSL1 |
| ENSGALT00000017477 | 779.7967 | 1846.017 | 24.86667 | 51.26333 | 1.043714 | 0.000141 | YIPF2 |
| ENSGALT00000017577 | 1596.887 | 4516.843 | 29.29667 | 72.84333 | 1.31406 | 3.03E-08 | LGMN |
| ENSGALT00000018268 | 17.96667 | 268.8033 | 0.476667 | 6.153333 | 3.690316 | 2.61E-05 | KITLG |
| ENSGALT00000018446 | 50.66667 | 572.6667 | 1.003333 | 9.466667 | 3.238056 | 7.58E-05 | DES |
| ENSGALT00000018468 | 172.42 | 2.283333 | 1.473333 | 0.016667 | -6.46597 | 7.06E-06 | ADGRL3 |
| ENSGALT00000018492 | 430.4133 | 1080.687 | 8.723333 | 18.94333 | 1.118739 | 0.001075 | CTH |
| ENSGALT00000019065 | 442.79 | 6762.437 | 3.906667 | 52.28667 | 3.742433 | 4.72E-54 | FNDC1 |
| ENSGALT00000019136 | 127.9867 | 0 | 0.893333 | 0.001 | -9.80305 | 4.47E-05 | MYLK |
| ENSGALT00000019284 | 1101 | 2767.333 | 40.92667 | 89.41333 | 1.127449 | 1.16E-05 | - |
| ENSGALT00000019286 | 7.506667 | 439.0467 | 0.063333 | 3.003333 | 5.567456 | 4.82E-05 | - |
| ENSGALT00000019412 | 85.33333 | 390.3333 | 1.19 | 4.743333 | 1.99494 | 0.001356 | CYP2D6 |
| ENSGALT00000019806 | 345.0733 | 1404.91 | 6.52 | 22.95 | 1.81555 | 2.68E-08 | PELI2 |
| ENSGALT00000020033 | 276.61 | 0 | 2.32 | 0.001 | -11.1799 | 1.89E-11 | MICALL1 |
| ENSGALT00000020391 | 3937.667 | 10835.33 | 85.05667 | 204.21 | 1.263557 | 7.19E-09 | TNFAIP6 |
| ENSGALT00000020714 | 457.6667 | 1405.667 | 5.136667 | 13.84333 | 1.430287 | 4.95E-06 | ALDH1L2 |
| ENSGALT00000020748 | 1156.603 | 429.2733 | 16.82667 | 5.49 | -1.61587 | 1.14E-05 | ATXN1 |
| ENSGALT00000021000 | 0 | 48 | 0.001 | 0.71 | 9.471675 | 0.000281 | SERPINB5 |
| ENSGALT00000021059 | 255 | 987.6667 | 3.473333 | 11.49667 | 1.726823 | 0.000217 | PKP2 |
| ENSGALT00000021117 | 112.3867 | 0 | 1.2 | 0.001 | -10.2288 | 0.000213 | CAPRIN2 |
| ENSGALT00000021124 | 4540.473 | 2505.44 | 181.1333 | 87.45 | -1.05052 | 1.55E-05 | BASP1 |
| ENSGALT00000021277 | 124.2633 | 601.4733 | 4.14 | 17.52 | 2.0813 | 7.68E-05 | - |
| ENSGALT00000021346 | 7730 | 3318.333 | 201.53 | 75.82 | -1.41034 | 1.08E-10 | AKR1B10L2 |
| ENSGALT00000021439 | 0 | 123.2267 | 0.001 | 1.21 | 10.24079 | 1.49E-06 | PLEKHA5 |
| ENSGALT00000021521 | 326.5533 | 0 | 7.45 | 0.001 | -12.863 | 1.09E-15 | BCAT1 |
| ENSGALT00000022376 | 0 | 183.39 | 0.001 | 1.963333 | 10.93909 | 4.35E-09 | EXOC1 |
| ENSGALT00000022420 | 726.3333 | 1863.667 | 33.16 | 75.39333 | 1.184993 | 3E-05 | IMPA2 |
| ENSGALT00000022669 | 37.50333 | 1710.763 | 0.493333 | 18.13 | 5.199672 | 0.000339 | VNN1 |
| ENSGALT00000022738 | 967.6667 | 2684.333 | 16.28333 | 40.42667 | 1.311911 | 2.78E-05 | SSPN |
| ENSGALT00000022900 | 0 | 411.3767 | 0.001 | 3.046667 | 11.57302 | 2.56E-08 | WASHC2C |
| ENSGALT00000023454 | 30.67667 | 0 | 0.593333 | 0.001 | -9.2127 | 0.000988 | BMF |
| ENSGALT00000023517 | 0 | 45.79 | 0.001 | 2.266667 | 11.14636 | 0.000362 | - |
| ENSGALT00000023783 | 0 | 116.4367 | 0.001 | 1.05 | 10.03617 | 0.000416 | EPHB6 |
| ENSGALT00000024260 | 162.5567 | 0 | 6.313333 | 0.001 | -12.6242 | 3.77E-09 | GTF3C6 |
| ENSGALT00000024844 | 6355.667 | 3158.667 | 77.74667 | 33.62 | -1.20946 | 1.54E-08 | EPHA3 |
| ENSGALT00000025640 | 279.72 | 23976.88 | 1.26 | 87.19667 | 6.112777 | 0.001147 | COL12A1 |
| ENSGALT00000026360 | 0 | 52.66667 | 0.001 | 0.343333 | 8.423466 | 0.000177 | MYOM2 |
| ENSGALT00000026765 | 0 | 36.28 | 0.001 | 0.95 | 9.891784 | 0.000909 | TCEANC |
| ENSGALT00000027208 | 1273.527 | 5645.67 | 9.326667 | 34.91 | 1.904207 | 1.48E-08 | COL4A2 |
| ENSGALT00000027273 | 631.47 | 6.783333 | 3.676667 | 0.033333 | -6.78529 | 0.000899 | DOCK9 |
| ENSGALT00000027346 | 421.6867 | 1281.953 | 1.2 | 3.12 | 1.378512 | 0.000361 | MYCBP2 |
| ENSGALT00000027377 | 0 | 155.9967 | 0.001 | 1.68 | 10.71425 | 0.000115 | DIAPH3 |
| ENSGALT00000027547 | 657.8233 | 238.38 | 15.81 | 4.956667 | -1.6734 | 0.000177 | SMAD9 |
| ENSGALT00000030620 | 4353 | 2040.667 | 76.77333 | 31.38333 | -1.29061 | 6.94E-09 | EMP1 |
| ENSGALT00000030933 | 5105.397 | 2743.117 | 73.82 | 34.38333 | -1.1023 | 9.44E-07 | MYL12A |
| ENSGALT00000031019 | 2785.387 | 1071.33 | 42.25667 | 13.70667 | -1.6243 | 1.89E-05 | CDH6 |
| ENSGALT00000031745 | 0 | 114.2233 | 0.001 | 1.23 | 10.26444 | 1.9E-06 | NCOA7 |
| ENSGALT00000034383 | 1405 | 3373 | 24.26 | 51.65667 | 1.090375 | 6.03E-06 | EFHD1 |
| ENSGALT00000036295 | 595.6667 | 174 | 30.01333 | 7.653333 | -1.97144 | 5.86E-05 | MUSTN1 |
| ENSGALT00000036427 | 3350.333 | 7752.333 | 52.64 | 105.7967 | 1.007063 | 2.46E-05 | TMEM123 |
| ENSGALT00000036803 | 5962.567 | 14211.28 | 77.24 | 159.0933 | 1.042453 | 1.49E-06 | APP |
| ENSGALT00000037894 | 3.666667 | 125 | 0.056667 | 1.586667 | 4.807355 | 0.000347 | MARCO |
| ENSGALT00000038754 | 16.66667 | 409 | 0.15 | 3.24 | 4.432959 | 1.4E-07 | CRB2 |
| ENSGALT00000038771 | 0.076667 | 405.26 | 0.001 | 1.936667 | 10.91936 | 2.89E-15 | TRPM7 |
| ENSGALT00000038787 | 21.33333 | 1062.577 | 0.28 | 11.99667 | 5.421063 | 5.09E-17 | NELL2 |
| ENSGALT00000038867 | 0 | 129.1067 | 0.001 | 0.76 | 9.569856 | 0.000267 | DOCK4 |
| ENSGALT00000039224 | 153 | 957 | 2.166667 | 12.04 | 2.474286 | 1.07E-08 | TGM2 |
| ENSGALT00000039331 | 54.33333 | 356.6667 | 0.773333 | 4.46 | 2.527881 | 0.000251 | NTN1 |
| ENSGALT00000040248 | 3404 | 1889.333 | 148.0867 | 71.22 | -1.05609 | 5.48E-05 | HSPB1 |
| ENSGALT00000040792 | 923.72 | 310.9233 | 22.49333 | 6.416667 | -1.8096 | 0.000153 | ARPC1A |
| ENSGALT00000042655 | 4561.38 | 2239.59 | 214.6833 | 94.59667 | -1.18235 | 1.98E-06 | HIST1H3H |
| ENSGALT00000042831 | 4135.857 | 1810.947 | 57.14667 | 21.92 | -1.38242 | 1.99E-07 | PRRX2 |
| ENSGALT00000042834 | 776.3333 | 127.3333 | 9.13 | 1.336667 | -2.77198 | 3.35E-09 | FOXO6 |
| ENSGALT00000043007 | 1367 | 661 | 65.83333 | 28.62667 | -1.20146 | 0.000252 | UBE2C |
| ENSGALT00000043224 | 4060.503 | 2178.913 | 119.6833 | 56.13333 | -1.09229 | 1.07E-05 | - |
| ENSGALT00000044247 | 1110.333 | 627 | 24.5 | 12.01 | -1.02855 | 0.00102 | PCBP4 |
| ENSGALT00000044685 | 140.3333 | 1571.667 | 2.136667 | 20.97 | 3.294893 | 2.83E-20 | CLDN1 |
| ENSGALT00000045908 | 133.8733 | 0 | 1.943333 | 0.001 | -10.9243 | 5.38E-08 | TMEM144 |
| ENSGALT00000046369 | 2517.333 | 1166.333 | 32.16667 | 13.06 | -1.30041 | 5.61E-08 | ETV1 |
| ENSGALT00000046421 | 131.82 | 0 | 0.486667 | 0.001 | -8.92679 | 0.000151 | ANK2 |
| ENSGALT00000046741 | 9270.34 | 5186.713 | 685.4967 | 340.52 | -1.00941 | 5.43E-06 | UBA52 |
| ENSGALT00000046957 | 25917.67 | 11740.67 | 969.6367 | 383.7033 | -1.33745 | 5.85E-07 | CSRP2 |
| ENSGALT00000047341 | 14.59 | 243.75 | 0.346667 | 5.126667 | 3.8864 | 1.67E-05 | CFD |
| ENSGALT00000048096 | 1739 | 5968.667 | 99.62333 | 299.96 | 1.590215 | 7.17E-13 | FABP4 |
| ENSGALT00000048298 | 587.5367 | 1653.387 | 2.853333 | 7.02 | 1.298823 | 6.85E-06 | TENM3 |
| ENSGALT00000049423 | 73.45667 | 0 | 0.68 | 0.001 | -9.40939 | 0.000971 | YEATS2 |
| ENSGALT00000049616 | 2259.323 | 1242.753 | 153.57 | 75.07 | -1.03259 | 5.15E-05 | H2A-VII |
| ENSGALT00000049664 | 361.16 | 0.44 | 6.836667 | 0.006667 | -10.0021 | 2.7E-16 | - |
| ENSGALT00000049776 | 717 | 2204 | 6.953333 | 19 | 1.450223 | 1.03E-05 | SNTB1 |
| ENSGALT00000049974 | 1239.267 | 4423.387 | 6.896667 | 22.50333 | 1.706168 | 0.000123 | PTN |
| ENSGALT00000050094 | 0 | 515.9367 | 0.001 | 10.91667 | 13.41424 | 4.04E-20 | DARS |
| ENSGALT00000050491 | 471.25 | 1879.133 | 5.67 | 19.95667 | 1.81545 | 6.74E-10 | GPR133 |
| ENSGALT00000050730 | 962.5133 | 458.32 | 20.86667 | 8.953333 | -1.2207 | 0.001186 | - |
| ENSGALT00000050895 | 100.9233 | 0 | 0.483333 | 0.001 | -8.91687 | 0.000295 | NF1 |
| ENSGALT00000051824 | 1068.107 | 459.21 | 15.45667 | 5.766667 | -1.42242 | 0.000197 | PROSER1 |
| ENSGALT00000052453 | 1044.723 | 556.6 | 19.45333 | 9.123333 | -1.09238 | 0.000694 | - |
| ENSGALT00000053045 | 4951.14 | 2792.13 | 48.36333 | 23.66 | -1.03146 | 4.02E-05 | ITGA3 |
| ENSGALT00000053460 | 92.08667 | 0 | 0.64 | 0.001 | -9.32193 | 0.000768 | PBRM1 |
| ENSGALT00000053465 | 48.97667 | 419.2767 | 1.25 | 9.306667 | 2.896336 | 0.001136 | ARHGAP1 |
| ENSGALT00000053661 | 894.4767 | 6333.94 | 5.656667 | 32.99667 | 2.544296 | 2.39E-10 | COL4A1 |
| ENSGALT00000053696 | 4.666667 | 157.3333 | 0.063333 | 1.88 | 4.891624 | 5.3E-05 | GABRG3 |
| ENSGALT00000053882 | 41 | 411.3333 | 1.653333 | 15.07333 | 3.188549 | 6.09E-05 | PTGDS |
| ENSGALT00000053963 | 436 | 129.1933 | 10.45667 | 2.706667 | -1.94983 | 0.000872 | TAF7L |
| ENSGALT00000054594 | 281.3633 | 0 | 2.263333 | 0.001 | -11.1442 | 1.66E-05 | COL5A2 |
| ENSGALT00000054775 | 0 | 103.9267 | 0.001 | 1.576667 | 10.62266 | 0.000553 | ERI1 |
| ENSGALT00000055290 | 10179.72 | 4108.593 | 50.18333 | 17.66 | -1.50672 | 4.7E-12 | FLNB |
| ENSGALT00000055720 | 67.53333 | 0.083333 | 2.06 | 0.003333 | -9.27146 | 1.68E-05 | - |
| ENSGALT00000055724 | 100.5033 | 0 | 3.303333 | 0.001 | -11.6897 | 2.33E-06 | RAN |
| ENSGALT00000055828 | 133.7733 | 0 | 1.36 | 0.001 | -10.4094 | 0.000144 | NOC3L |
| ENSGALT00000055964 | 69.14 | 0 | 1.126667 | 0.001 | -10.1378 | 4.6E-05 | PRKCD |
| ENSGALT00000056073 | 1478.667 | 787.3333 | 28.26 | 13.25 | -1.09277 | 0.000333 | SHISA4 |
| ENSGALT00000056093 | 0.336667 | 218.5267 | 0.003333 | 1.293333 | 8.599913 | 0.001052 | ZNF236 |
| ENSGALT00000056579 | 0 | 110.8067 | 0.001 | 1.206667 | 10.23681 | 0.000396 | HEPH |
| ENSGALT00000056622 | 2586.107 | 1291.343 | 84.31667 | 37.39333 | -1.17304 | 3.45E-06 | - |
| ENSGALT00000057104 | 8.5 | 333.7833 | 0.193333 | 6.27 | 5.019303 | 1.81E-05 | CPQ |
| ENSGALT00000057227 | 0 | 231.1467 | 0.001 | 2.713333 | 11.40585 | 0.000928 | FARP2 |
| ENSGALT00000057294 | 0 | 173.7667 | 0.001 | 3.79 | 11.88798 | 8.42E-05 | ME1 |
| ENSGALT00000057472 | 1215.17 | 3739.843 | 13.15667 | 35.04 | 1.413209 | 3.15E-08 | ANGPT1 |
| ENSGALT00000057988 | 1775.8 | 887.7733 | 21.45333 | 9.386667 | -1.19252 | 1.16E-05 | SFPQ |
| ENSGALT00000058115 | 2233.79 | 1169.797 | 174.3733 | 81.31667 | -1.10056 | 1.99E-05 | HIST2H3L |
| ENSGALT00000058183 | 49.38667 | 438.5033 | 0.27 | 2.153333 | 2.99554 | 0.000151 | NLRC5 |
| ENSGALT00000059836 | 20 | 189.6667 | 0.383333 | 3.29 | 3.101416 | 0.001076 | WNT2B |
| ENSGALT00000060472 | 0 | 74.90333 | 0.001 | 0.736667 | 9.524868 | 3.31E-05 | ABHD4 |
| ENSGALT00000061155 | 696.8133 | 1878.44 | 10.94667 | 25.55 | 1.222832 | 1E-05 | VAV2 |
| ENSGALT00000061252 | 294.55 | 0 | 2.283333 | 0.001 | -11.1569 | 8.42E-06 | FYCO1 |
| ENSGALT00000061435 | 1255.8 | 566.32 | 13.56667 | 5.47 | -1.31045 | 0.000168 | MGLL |
| ENSGALT00000062206 | 0 | 655.06 | 0.001 | 13.39 | 13.70887 | 2.26E-22 | EHD2 |
| ENSGALT00000062246 | 145.6367 | 0 | 3.146667 | 0.001 | -11.6196 | 1.64E-08 | NFS1 |
| ENSGALT00000063011 | 52.56333 | 441.3333 | 0.806667 | 5.863333 | 2.861677 | 4.44E-05 | CLSTN2 |
| ENSGALT00000063435 | 263 | 15.66667 | 2.246667 | 0.123333 | -4.18715 | 4.14E-06 | CDH5 |
| ENSGALT00000063723 | 104.7367 | 0 | 0.573333 | 0.001 | -9.16323 | 0.000285 | BAZ2B |
| ENSGALT00000063785 | 0 | 59.96667 | 0.001 | 0.486667 | 8.92679 | 8.07E-05 | - |
| ENSGALT00000064261 | 0 | 284.7833 | 0.001 | 1.786667 | 10.80305 | 1.05E-05 | MON2 |
| ENSGALT00000064658 | 0.006667 | 307.8233 | 0.001 | 1.216667 | 10.24872 | 3.43E-11 | COL12A1 |
| ENSGALT00000064755 | 1574.76 | 697.7567 | 21.92667 | 8.736667 | -1.32753 | 3.37E-05 | COL6A2 |
| ENSGALT00000064801 | 1328.287 | 593.4467 | 21.67667 | 8.296667 | -1.38554 | 4.34E-05 | ANXA11 |
| ENSGALT00000064849 | 30.75 | 0 | 0.446667 | 0.001 | -8.80305 | 0.001058 | OSGIN2 |
| ENSGALT00000064884 | 2913.86 | 1296.813 | 4.963333 | 1.85 | -1.42378 | 9.52E-05 | MACF1 |
| ENSGALT00000064987 | 188.2033 | 785.9167 | 1.626667 | 6.033333 | 1.891037 | 0.000213 | AQP9 |
| ENSGALT00000065033 | 3428.737 | 1792.627 | 23.50333 | 10.69667 | -1.1357 | 6.25E-07 | TJP1 |
| ENSGALT00000065420 | 367.28 | 1047.003 | 6.563333 | 16.37333 | 1.318847 | 0.000234 | CPZ |
| ENSGALT00000065566 | 2214.667 | 1163.333 | 209.9467 | 95.56667 | -1.13544 | 1.78E-05 | S100A6 |
| ENSGALT00000065870 | 367.76 | 41.9 | 7.18 | 0.753333 | -3.25262 | 0.000136 | SLC11A2 |
| ENSGALT00000066110 | 95.24333 | 0 | 0.676667 | 0.001 | -9.4023 | 6.4E-06 | COL3A1 |
| ENSGALT00000066797 | 224.4867 | 0 | 1.07 | 0.001 | -10.0634 | 5.99E-11 | ITPR2 |
| ENSGALT00000067220 | 0.03 | 527.06 | 0.001 | 7.69 | 12.90877 | 2.24E-07 | HCFC2 |
| ENSGALT00000067503 | 0 | 169.7867 | 0.001 | 1.18 | 10.20457 | 6.4E-05 | EIF4G3 |
| ENSGALT00000067650 | 0 | 180.16 | 0.001 | 1.92 | 10.90689 | 1.14E-08 | - |
| ENSGALT00000067693 | 73.72333 | 512.7267 | 0.463333 | 2.666667 | 2.524915 | 0.000311 | SLIT2 |
| ENSGALT00000068153 | 30383.22 | 16067.28 | 665.7733 | 310.0333 | -1.10261 | 1.1E-06 | IGFBP4 |
| ENSGALT00000068652 | 546.3333 | 1361 | 6.316667 | 13.86667 | 1.134386 | 0.000169 | - |
| ENSGALT00000069044 | 0 | 169.9167 | 0.001 | 2.77 | 11.43567 | 6.61E-05 | SLC41A3 |
| ENSGALT00000069065 | 51.83 | 341.8167 | 0.65 | 3.846667 | 2.565097 | 0.000345 | FAAP100 |
| ENSGALT00000069078 | 63.18667 | 0 | 0.483333 | 0.001 | -8.91687 | 2.73E-05 | MICAL2 |
| ENSGALT00000069178 | 35.90667 | 0 | 0.533333 | 0.001 | -9.05889 | 0.000496 | - |
| ENSGALT00000069195 | 678.37 | 1967.483 | 9.253333 | 23.55667 | 1.34809 | 2.24E-06 | ZC3H12A |
| ENSGALT00000070123 | 1264.43 | 662.8833 | 24.07667 | 11.1 | -1.11708 | 0.000191 | LSAMP |
| ENSGALT00000070134 | 97.62667 | 1002.987 | 2.5 | 21.39 | 3.096936 | 1.13E-06 | - |
| ENSGALT00000070141 | 5577.333 | 13996.67 | 84.27 | 181.53 | 1.107117 | 7.84E-06 | KRT7 |
| ENSGALT00000070463 | 682.34 | 3884.847 | 7.32 | 35.72 | 2.286817 | 4.93E-17 | ACSL1 |
| ENSGALT00000070590 | 0 | 58.39667 | 0.001 | 0.38 | 8.569856 | 0.000156 | KIF21A |
| ENSGALT00000070810 | 3489.177 | 11896.57 | 45.52 | 135.03 | 1.568708 | 1.32E-13 | TGFBI |
| ENSGALT00000071251 | 181.4 | 0 | 1.71 | 0.001 | -10.7398 | 0.00031 | NRK |
| ENSGALT00000071599 | 60.96667 | 0 | 0.716667 | 0.001 | -9.48516 | 3.6E-05 | USP35 |
| ENSGALT00000072072 | 1212.727 | 583.09 | 8.966667 | 3.78 | -1.24619 | 3.2E-05 | DOT1L |
| ENSGALT00000072351 | 2161 | 4922.667 | 13.28 | 26.67333 | 1.006143 | 1.46E-05 | MGAT3 |
| ENSGALT00000073900 | 155.43 | 0 | 4.543333 | 0.001 | -12.1495 | 7.88E-07 | GMDS |
| ENSGALT00000074158 | 150.2533 | 0 | 2.503333 | 0.001 | -11.2896 | 8.09E-05 | RPS6KA1L |
| ENSGALT00000074222 | 11.12 | 392.48 | 0.126667 | 3.696667 | 4.867116 | 1.26E-05 | GRIA4 |
| ENSGALT00000074532 | 0 | 192.3333 | 0.001 | 1.67 | 10.70563 | 4.86E-05 | ZMYND8 |
| ENSGALT00000075242 | 622.7667 | 2337.863 | 12.14 | 41.16 | 1.761475 | 0.000143 | SPON2 |
| ENSGALT00000075541 | 0 | 85.73333 | 0.001 | 1.786667 | 10.80305 | 0.000929 | ZFAND6 |
| ENSGALT00000076033 | 31.63667 | 253.99 | 0.57 | 3.99 | 2.807355 | 0.001179 | VNN1 |
| ENSGALT00000076208 | 0 | 110.54 | 0.001 | 3.236667 | 11.66029 | 0.000226 | TENT5B |
| ENSGALT00000076280 | 9.52 | 651.92 | 0.363333 | 21.04 | 5.855697 | 2.14E-05 | HNRNPA2B1 |
| ENSGALT00000076700 | 521.6167 | 1323.013 | 5.503333 | 12.05333 | 1.131055 | 0.00052 | PCDH7 |
| ENSGALT00000077508 | 0 | 94.06 | 0.001 | 0.543333 | 9.085694 | 0.001209 | DICER1 |
| ENSGALT00000077742 | 303.3867 | 1509.613 | 7.586667 | 32.86333 | 2.114941 | 1.02E-10 | KRT14 |
| ENSGALT00000077783 | 105.2433 | 556.1167 | 1.506667 | 7.346667 | 2.28573 | 0.000232 | PRICKLE1 |
| ENSGALT00000078334 | 944.0033 | 35.78333 | 8.73 | 0.266667 | -5.03287 | 0.000499 | KANSL1 |
| ENSGALT00000078438 | 1615.583 | 4775.633 | 14.87333 | 38.84667 | 1.385063 | 1.06E-08 | ALDH1A3 |
| ENSGALT00000078597 | 51.79667 | 0 | 0.38 | 0.001 | -8.56986 | 0.000116 | PIK3C2B |
| ENSGALT00000078804 | 457 | 1116 | 4.576667 | 9.73 | 1.088143 | 0.000937 | GPC1 |
| ENSGALT00000079349 | 1085.83 | 2568.217 | 21.36333 | 43.69333 | 1.032276 | 4.26E-05 | SLA |
| ENSGALT00000079911 | 3005.963 | 1652.163 | 61.84 | 29.16333 | -1.08438 | 3.18E-05 | ID2 |
| ENSGALT00000080130 | 9354.197 | 3839.21 | 131.06 | 46.78667 | -1.48606 | 4.19E-10 | PRELP |
| ENSGALT00000080666 | 1752.333 | 858.3333 | 69.29 | 29.29667 | -1.24191 | 3.05E-05 | HEY2 |
| ENSGALT00000080706 | 1515.03 | 785.3133 | 24.05 | 10.82333 | -1.15189 | 4.64E-05 | EBF3 |
| ENSGALT00000080871 | 4996.813 | 2629.097 | 63.99667 | 29.37 | -1.12365 | 5.44E-07 | NHE1 |
| ENSGALT00000080967 | 11981.36 | 5672.083 | 946.7267 | 390.3567 | -1.27816 | 2.02E-07 | - |
| ENSGALT00000081677 | 419.6133 | 1114.37 | 9.786667 | 22.44 | 1.197183 | 0.000917 | CTSH |
| ENSGALT00000081697 | 256.7433 | 756.9067 | 0.703333 | 1.823333 | 1.374298 | 0.001266 | ANK3 |
| ENSGALT00000081755 | 0 | 274.93 | 0.001 | 9.943333 | 13.27951 | 1.55E-09 | MMD |
| ENSGALT00000081767 | 756 | 343.3333 | 11.37667 | 4.41 | -1.36723 | 0.000708 | CLMN |
| ENSGALT00000082196 | 52.68 | 748.4267 | 1.72 | 21.45333 | 3.640721 | 6.77E-10 | - |
| ENSGALT00000082236 | 692.07 | 1869.977 | 11.81333 | 27.31667 | 1.209365 | 0.000499 | HNRNPH2 |
| ENSGALT00000082609 | 331.7933 | 0.023333 | 2.06 | 0.001 | -11.0084 | 0.000295 | BRWD1 |
| ENSGALT00000082796 | 0 | 7956.223 | 0.001 | 144.5733 | 17.14144 | 1.1E-172 | SERPINE2 |
| ENSGALT00000083087 | 0 | 68.65333 | 0.001 | 0.286667 | 8.16323 | 4.96E-05 | PIEZO2 |
| ENSGALT00000083181 | 2317.107 | 1271.95 | 53.48667 | 25.86 | -1.04846 | 3.54E-05 | NFIC |
| ENSGALT00000083806 | 1223.88 | 323.5333 | 13.14 | 2.993333 | -2.13414 | 7.97E-07 | ZNF628 |
| ENSGALT00000084159 | 46.28333 | 0 | 0.71 | 0.001 | -9.47168 | 0.000178 | MCM5 |
| ENSGALT00000084241 | 9305.04 | 3377.803 | 169.1 | 52.97667 | -1.67445 | 3.09E-10 | TPM1 |
| ENSGALT00000084513 | 73.77 | 0 | 1.456667 | 0.001 | -10.5085 | 1.83E-05 | SAMD11 |
| ENSGALT00000084614 | 2281.18 | 6709.047 | 55.14333 | 146.71 | 1.411709 | 5.77E-05 | ZCCHC13 |
| ENSGALT00000084623 | 577.9733 | 7.77 | 10.17333 | 0.11 | -6.53115 | 5.16E-08 | THOC1 |
| ENSGALT00000084627 | 3222.497 | 1850.053 | 41.92333 | 20.57333 | -1.02698 | 0.000275 | CEP170P1 |
| ENSGALT00000084690 | 0.003333 | 148.4067 | 0.001 | 2.906667 | 11.50515 | 5.51E-08 | NFYC |
| ENSGALT00000084705 | 1882.06 | 6154.003 | 31.65333 | 89.33 | 1.496787 | 3.89E-11 | FBLN1 |
| ENSGALT00000085458 | 0 | 94.47333 | 0.001 | 0.42 | 8.714246 | 0.000579 | TENM3 |
| ENSGALT00000086325 | 3033 | 1704.667 | 168.49 | 83.95667 | -1.00495 | 2.24E-05 | H2AFV |
| ENSGALT00000086768 | 1114.373 | 426.3867 | 47.13333 | 15.18 | -1.63458 | 6.59E-05 | CO6 |
| ENSGALT00000087596 | 0 | 147.7667 | 0.001 | 3.016667 | 11.55874 | 1.47E-07 | MFF |
| ENSGALT00000087698 | 0 | 54.50667 | 0.001 | 1.306667 | 10.35168 | 0.000275 | SFXN1 |
| ENSGALT00000088663 | 134.81 | 549.66 | 3.09 | 11.09667 | 1.844448 | 0.000411 | - |
| ENSGALT00000089249 | 1207.19 | 3473.617 | 47.42667 | 120.5767 | 1.34618 | 7.88E-08 | HPGDS |
| ENSGALT00000089896 | 3647.74 | 9496.493 | 18.36333 | 41.44333 | 1.174312 | 7.05E-08 | MYLK |
| ENSGALT00000089897 | 12.27667 | 679.5367 | 0.166667 | 7.35 | 5.462707 | 4.85E-05 | - |
| ENSGALT00000089976 | 0 | 41.97667 | 0.001 | 0.503333 | 8.97537 | 0.000499 | KCNAB1 |
| ENSGALT00000090167 | 22 | 851.6667 | 0.506667 | 17.23667 | 5.0883 | 1.1E-17 | KRT19 |
| ENSGALT00000090178 | 114.3333 | 599.6667 | 3.27 | 14.55 | 2.153657 | 0.000145 | UCH-L1 |
| ENSGALT00000090332 | 108.26 | 0 | 1.946667 | 0.001 | -10.9268 | 0.000246 | PDCD4 |
| ENSGALT00000090491 | 0 | 154.0533 | 0.001 | 0.953333 | 9.896837 | 1.12E-07 | CLASP1 |
| ENSGALT00000090601 | 180.1267 | 787.62 | 5.76 | 21.21333 | 1.880831 | 0.000288 | - |
| ENSGALT00000090693 | 20.92667 | 631.0133 | 0.393333 | 10.40333 | 4.72515 | 7.1E-14 | - |
| ENSGALT00000090967 | 0 | 36.33667 | 0.001 | 0.546667 | 9.094518 | 0.000844 | FKBP51 |
| ENSGALT00000091022 | 0 | 362.6833 | 0.001 | 1.473333 | 10.52487 | 2.31E-06 | EP400 |
| ENSGALT00000091142 | 468.3533 | 1151.523 | 6.41 | 13.87667 | 1.114265 | 0.000724 | PDLIM3 |
| ENSGALT00000091282 | 271.7067 | 1405.827 | 4.503333 | 21.09667 | 2.22795 | 6.81E-05 | PTN |
| ENSGALT00000091395 | 0 | 780.1167 | 0.001 | 6.423333 | 12.64911 | 2.16E-27 | - |
| ENSGALT00000091414 | 0 | 155.2567 | 0.001 | 3.996667 | 11.96458 | 7.23E-08 | CTSS |
| ENSGALT00000091481 | 0 | 199.9267 | 0.001 | 2.443333 | 11.25463 | 3.42E-09 | DGKZ |
| ENSGALT00000091789 | 0 | 120.38 | 0.001 | 1.233333 | 10.26835 | 1.63E-05 | SLC4A7 |
| ENSGALT00000091903 | 1213.63 | 3027.67 | 21.65333 | 46.25667 | 1.095072 | 3.36E-05 | - |
| ENSGALT00000091920 | 610.6033 | 1854.56 | 7.42 | 19.53667 | 1.396693 | 4.43E-06 | ATF3 |
| ENSGALT00000092253 | 9582.767 | 5398.273 | 265.1633 | 132.1733 | -1.00445 | 0.000493 | LSP1 |
| ENSGALT00000092964 | 5.333333 | 126.6667 | 0.063333 | 1.293333 | 4.351985 | 0.000238 | - |
| ENSGALT00000093081 | 5175.607 | 2663.02 | 99.53 | 44.92333 | -1.14767 | 4.55E-05 | ZYX |
| ENSGALT00000093149 | 1060.107 | 5676.057 | 16.51 | 78.72 | 2.25339 | 1.45E-09 | SPON2 |
| ENSGALT00000093481 | 0 | 607.6267 | 0.001 | 2.963333 | 11.53301 | 3.77E-22 | ZNF638 |
| ENSGALT00000093574 | 0 | 333.4267 | 0.001 | 1.613333 | 10.65583 | 3.68E-06 | SETD2 |
| ENSGALT00000093605 | 17.81667 | 206.6433 | 0.24 | 2.326667 | 3.277158 | 0.00075 | - |
| ENSGALT00000093681 | 155.6267 | 0 | 1.416667 | 0.001 | -10.4683 | 6.53E-08 | FGD5 |
| ENSGALT00000093959 | 1.843333 | 421.5433 | 0.02 | 3.78 | 7.562242 | 3.98E-05 | ZNF644 |
| ENSGALT00000094109 | 2249.46 | 1158.497 | 46.52667 | 20.76 | -1.16425 | 6.71E-05 | PDLIM5 |
| ENSGALT00000094186 | 93.62333 | 511.3833 | 1.713333 | 7.88 | 2.20139 | 0.000625 | PITPNA |
| ENSGALT00000094199 | 0 | 34.13333 | 0.001 | 0.256667 | 8.003752 | 0.001056 | EHD2 |
| ENSGALT00000094415 | 0 | 37.99 | 0.001 | 0.446667 | 8.803055 | 0.000729 | - |
| ENSGALT00000094600 | 0 | 248.0733 | 0.001 | 2.816667 | 11.45977 | 0.001177 | NHE1 |
| ENSGALT00000094699 | 77.76 | 0 | 0.406667 | 0.001 | -8.6677 | 0.000929 | NAV3 |
| ENSGALT00000094722 | 1320.06 | 137.05 | 11.81667 | 1.113333 | -3.40787 | 1.3E-10 | - |
| ENSGALT00000094819 | 338.21 | 0.69 | 3.65 | 0.006667 | -9.09672 | 1.93E-05 | TUBGCP3 |
| ENSGALT00000095013 | 535.02 | 44.05667 | 4.34 | 0.29 | -3.90357 | 0.000441 | - |
| ENSGALT00000095286 | 338.5667 | 1177.51 | 10.19 | 31.20333 | 1.614546 | 0.000114 | TXNIP |
| ENSGALT00000095473 | 78.75333 | 0 | 1.49 | 0.001 | -10.5411 | 0.001109 | GAB2 |
| ENSGALT00000095514 | 0 | 130.9433 | 0.001 | 2.54 | 11.31061 | 0.000197 | NT5C3B |
| ENSGALT00000095538 | 1263.507 | 544.49 | 16.31333 | 6.006667 | -1.44142 | 0.000408 | HDAC7 |
| ENSGALT00000095688 | 86.53 | 0 | 0.72 | 0.001 | -9.49185 | 3.66E-06 | DISP1 |
| ENSGALT00000095829 | 1489.293 | 727.28 | 19.79 | 8.326667 | -1.24896 | 1.23E-05 | CO6 |
| ENSGALT00000096012 | 903.26 | 2339.793 | 17.66 | 40.63 | 1.20206 | 3.68E-05 | - |
| ENSGALT00000096699 | 1107.07 | 406.68 | 6.11 | 1.966667 | -1.63542 | 2.96E-05 | WDR81 |
| ENSGALT00000096731 | 46.61333 | 0 | 0.68 | 0.001 | -9.40939 | 0.000455 | - |
| ENSGALT00000096739 | 763.8567 | 239.0733 | 10.57333 | 2.916667 | -1.85804 | 0.000197 | MFAP5 |
| ENSGALT00000096778 | 0 | 91.02 | 0.001 | 0.933333 | 9.866249 | 0.001019 | SLC12A4 |
| ENSGALT00000096919 | 1079.753 | 568.6667 | 13.69333 | 6.406667 | -1.09583 | 0.000799 | CCNT1 |
| ENSGALT00000096983 | 335.22 | 1348.543 | 6.183333 | 21.55 | 1.801231 | 7.21E-08 | SLC2A6 |
| ENSGALT00000097326 | 77.69333 | 0 | 0.923333 | 0.001 | -9.85071 | 1.57E-05 | RANBP3 |
| ENSGALT00000097495 | 58.11667 | 542.3733 | 1.4 | 10.98667 | 2.972255 | 5.14E-05 | - |
| ENSGALT00000097534 | 0.01 | 117.8333 | 0.001 | 2.406667 | 11.23282 | 0.000456 | TTYH3 |
| ENSGALT00000097593 | 91.76 | 0 | 1.886667 | 0.001 | -10.8816 | 0.000432 | CPQ |
| ENSGALT00000097737 | 76.87667 | 0 | 0.446667 | 0.001 | -8.80305 | 0.000742 | GOLGA3 |
| ENSGALT00000097759 | 1812.947 | 870.1167 | 19.95667 | 8.34 | -1.25875 | 0.000168 | SLK |
| ENSGALT00000098111 | 68.18667 | 0 | 0.956667 | 0.001 | -9.90187 | 3.61E-05 | CKAP2L |
| ENSGALT00000098331 | 0.116667 | 443.4 | 0.001 | 5.873333 | 12.51996 | 0.00013 | MAP7D3 |
| ENSGALT00000098423 | 31.82333 | 558.46 | 0.59 | 8.373333 | 3.827015 | 0.000541 | ADAM8 |
| ENSGALT00000098508 | 588.1433 | 1699.803 | 9.416667 | 24.30667 | 1.368064 | 0.000237 | SLA |
| ENSGALT00000098556 | 306.2167 | 19.40667 | 4.05 | 0.21 | -4.26946 | 0.000112 | FMNL3 |
| ENSGALT00000098807 | 147.2467 | 0 | 0.65 | 0.001 | -9.3443 | 0.000101 | COL6A3 |
| ENSGALT00000098881 | 28.26 | 243.5433 | 0.313333 | 2.373333 | 2.921145 | 0.000991 | SEMA3A |
| ENSGALT00000099658 | 88.35667 | 0.04 | 1.14 | 0.001 | -10.1548 | 0.000397 | RPS6KA1L |
| ENSGALT00000099686 | 1792.517 | 5589.677 | 26.99667 | 72.81667 | 1.431487 | 4.99E-10 | - |
| ENSGALT00000099830 | 1012.963 | 7878.827 | 10.12667 | 66.65667 | 2.71859 | 1.91E-08 | CP |
| ENSGALT00000099918 | 75.36333 | 0 | 0.76 | 0.001 | -9.56986 | 0.001019 | - |
| ENSGALT00000100197 | 25.19667 | 269.77 | 0.493333 | 4.56 | 3.208399 | 0.000163 | TMEM154 |
| ENSGALT00000100252 | 3383.947 | 1951.32 | 25.85 | 12.74333 | -1.02042 | 0.000341 | TNC |
| ENSGALT00000100295 | 46.36667 | 0 | 1.153333 | 0.001 | -10.1716 | 0.000306 | Nnf1 |
| ENSGALT00000100688 | 236.03 | 0.79 | 2.41 | 0.006667 | -8.49785 | 1.28E-07 | FNBP1L |
| ENSGALT00000100959 | 367.6133 | 0 | 2.57 | 0.001 | -11.3276 | 1.37E-09 | ROBO1 |
| ENSGALT00000101232 | 309.77 | 2835.967 | 6.973333 | 52.59667 | 2.915051 | 1.71E-05 | - |
| ENSGALT00000101271 | 586.62 | 3272.207 | 9.963333 | 46.82 | 2.232425 | 4.04E-06 | - |
| ENSGALT00000101385 | 473.9633 | 1197.823 | 12.49333 | 27.06 | 1.115003 | 0.001007 | ACOT9 |
| ENSGALT00000101668 | 0 | 77.57667 | 0.001 | 2.373333 | 11.2127 | 1.82E-05 | AKAP10 |
| ENSGALT00000101993 | 88.96333 | 0 | 1.376667 | 0.001 | -10.427 | 9.9E-06 | SOBP |
| ENSGALT00000102010 | 108.5433 | 0 | 1.713333 | 0.001 | -10.7426 | 9.58E-07 | - |
| ENSGALT00000102126 | 2070.35 | 1095.697 | 14.29667 | 6.576667 | -1.12025 | 0.000142 | CDC42BPA |
| ENSGALT00000102159 | 58.54 | 589.4767 | 1.303333 | 11.35667 | 3.123261 | 1.02E-07 | TFPI2 |
| ENSGALT00000102657 | 0 | 93.11667 | 0.001 | 1.5 | 10.55075 | 5.07E-06 | DCBLD2 |
| ENSGALT00000102676 | 0 | 85.27667 | 0.001 | 1.013333 | 9.984893 | 1.65E-05 | GARNL3 |
| ENSGALT00000103060 | 0 | 36.71 | 0.001 | 0.256667 | 8.003752 | 0.000743 | - |
| ENSGALT00000103639 | 0 | 61.51 | 0.001 | 0.436667 | 8.770389 | 9.21E-05 | SHPRH |
| ENSGALT00000103727 | 0 | 1286.94 | 0.001 | 11.49 | 13.48809 | 7.97E-08 | SEC61A1 |
| ENSGALT00000103876 | 1156.03 | 614.4067 | 19.52333 | 9.266667 | -1.07508 | 0.00066 | MAP2K7 |
| ENSGALT00000103905 | 0 | 69.03333 | 0.001 | 0.343333 | 8.423466 | 8.64E-05 | - |
| ENSGALT00000103953 | 0 | 1169.307 | 0.001 | 2.42 | 11.24079 | 1.27E-11 | KIAA1109 |
| ENSGALT00000103986 | 1103.273 | 391.5933 | 6.576667 | 2.033333 | -1.69351 | 3.53E-06 | ARHGAP21 |
| ENSGALT00000104080 | 260.7733 | 0 | 4.45 | 0.001 | -12.1196 | 5.03E-06 | BICD2 |
| ENSGALT00000104308 | 179.31 | 1862.41 | 3.586667 | 31.02667 | 3.112793 | 5.98E-07 | - |
| ENSGALT00000105031 | 1541.847 | 228.4333 | 29.76333 | 3.793333 | -2.972 | 2.31E-13 | LPP |
| ENSGALT00000105055 | 1019.547 | 485.5567 | 22.51667 | 9.25 | -1.28347 | 0.000248 | NEURL1B |
| ENSGALT00000105140 | 1.9 | 118.8533 | 0.106667 | 5.423333 | 5.667999 | 0.000533 | CCLL4 |
| ENSGALT00000105236 | 0 | 70.7 | 0.001 | 1.396667 | 10.44777 | 3.74E-05 | SPATA7 |
| ENSGALT00000105372 | 1183.01 | 2.713333 | 8.256667 | 0.016667 | -8.95245 | 9.79E-06 | TNC |
| ENSGALT00000105912 | 72.79333 | 0 | 0.33 | 0.001 | -8.36632 | 0.000903 | KALRN |
| ENSGALT00000106006 | 33.06333 | 0 | 0.71 | 0.001 | -9.47168 | 0.000765 | - |
| ENSGALT00000106025 | 4603.323 | 2461.443 | 22.1 | 10.39333 | -1.08839 | 6.01E-05 | PRRC2C |
| ENSGALT00000106558 | 1281.9 | 3219.473 | 15.21667 | 32.92 | 1.113312 | 5.69E-05 | JAM3 |
| ENSGALT00000106626 | 36.68 | 0 | 0.396667 | 0.001 | -8.63178 | 0.000576 | SPATA20 |
| ENSGALT00000106706 | 880.7567 | 313.0033 | 13.52333 | 4.23 | -1.67672 | 7.8E-05 | GIT1 |
| ENSGALT00000107004 | 0 | 75.42 | 0.001 | 0.433333 | 8.759333 | 8.85E-05 | EPB41L1 |
| ENSGALT00000107339 | 785.6333 | 3101.6 | 24.15333 | 83.61333 | 1.791511 | 1.88E-10 | PLSCR1 |
| ENSGALT00000107494 | 64.2 | 464.7867 | 2.463333 | 14.94 | 2.600496 | 0.0005 | - |
| ENSGALT00000107513 | 4287.987 | 13289.14 | 17.93 | 48.4 | 1.432632 | 4.49E-11 | COL6A3 |
| ENSGALT00000107989 | 443.04 | 1801.173 | 2.793333 | 9.916667 | 1.827868 | 2.11E-09 | - |
| TCONS_00000468 | 354.5467 | 1012.043 | 8.49 | 20.95667 | 1.303573 | 0.000475 | BCAP29 |
| TCONS_00000512 | 53.32 | 548.6033 | 0.373333 | 3.34 | 3.161312 | 2.6E-05 | GRAMD4 |
| TCONS_00000669 | 0 | 207.8567 | 0.001 | 0.933333 | 9.866249 | 7.75E-10 | TMEM168 |
| TCONS_00001077 | 749.9 | 2004.35 | 3.97 | 9.186667 | 1.210402 | 5.71E-05 | Plxnc1 |
| TCONS_00001166 | 2776.033 | 1538.617 | 128.0233 | 60.89667 | -1.07197 | 0.00021 | H2B-I |
| TCONS_00001387 | 171.3333 | 1463.103 | 1.8 | 14.06667 | 2.966212 | 4.08E-10 | C1qtnf6 |
| TCONS_00001880 | 268.78 | 1661.76 | 1.32 | 6.9 | 2.386058 | 3.1E-11 | BCAT1 |
| TCONS_00002159 | 7238.273 | 22623 | 91.24333 | 250.1167 | 1.45481 | 3.46E-12 | FBLN1 |
| TCONS_00002415 | 0 | 45.77333 | 0.001 | 0.6 | 9.228819 | 0.000347 | A2ML1 |
| TCONS_00002512 | 0 | 99.67 | 0.001 | 1.136667 | 10.15059 | 0.000571 | ENO2 |
| TCONS_00003321 | 274.6467 | 0.006667 | 0.323333 | 0.001 | -8.33688 | 3.39E-06 | Vgll3 |
| TCONS_00004040 | 0.1 | 470.3567 | 0.001 | 3.08 | 11.58871 | 6.44E-07 | TAB3 |
| TCONS_00004310 | 74.66667 | 581.6667 | 0.326667 | 2.15 | 2.718446 | 3.35E-05 | MXRA5 |
| TCONS_00005345 | 1486.527 | 759.8167 | 9.163333 | 4.013333 | -1.19107 | 0.000276 | SMAD9 |
| TCONS_00005459 | 69.57333 | 766.8867 | 0.97 | 8.993333 | 3.212799 | 1.69E-07 | FLT1 |
| TCONS_00005782 | 85.00667 | 0 | 1.02 | 0.001 | -9.99435 | 0.000617 | MRE11 |
| TCONS_00006425 | 0 | 114.6467 | 0.001 | 1.16 | 10.17991 | 0.0003 | FAM107B |
| TCONS_00006629 | 2299.68 | 7921.513 | 16.90333 | 50.50333 | 1.579071 | 1.78E-10 | LAMB1 |
| TCONS_00006632 | 1825.523 | 5515.887 | 13.05333 | 34.68333 | 1.409824 | 2.16E-10 | LAMB1 |
| TCONS_00006704 | 807.9667 | 0.043333 | 6.416667 | 0.001 | -12.6476 | 1.5E-07 | PIM3 |
| TCONS_00006936 | 37.23 | 0 | 0.296667 | 0.001 | -8.2127 | 0.00056 | PUS7L |
| TCONS_00007229 | 134.1533 | 1775.303 | 0.36 | 4.16 | 3.530515 | 2.31E-23 | KITLG |
| TCONS_00007588 | 183.0433 | 1479.833 | 3.023333 | 22.46333 | 2.89336 | 7.24E-11 | TRIOBP |
| TCONS_00007663 | 530.01 | 1287.197 | 4.55 | 9.78 | 1.103968 | 0.000391 | btbd11a |
| TCONS_00008386 | 898.8433 | 348.08 | 11.92667 | 3.953333 | -1.59305 | 0.000233 | Mfap5 |
| TCONS_00008847 | 1184.91 | 3101.933 | 10.76333 | 24.46333 | 1.184496 | 1.31E-05 | COL8A1 |
| TCONS_00009352 | 219.2833 | 843.8033 | 1.373333 | 4.623333 | 1.751252 | 5.32E-05 | TIAM1 |
| TCONS_00009692 | 1426.26 | 3455.127 | 5.426667 | 11.37667 | 1.06794 | 4.54E-06 | GK |
| TCONS_00009837 | 264.84 | 972.41 | 1.31 | 4.213333 | 1.685395 | 3.03E-05 | NHS |
| TCONS_00010276 | 1134.957 | 1.11 | 5.186667 | 0.003333 | -10.6036 | 2.4E-05 | ATP11A |
| TCONS_00010586 | 4830.493 | 2314.263 | 44.48333 | 18.43667 | -1.27069 | 4.45E-08 | LMO7 |
| TCONS_00010757 | 0 | 55.53667 | 0.001 | 0.56 | 9.129283 | 0.000226 | Lcp1 |
| TCONS_00010980 | 43.44 | 408.4267 | 0.483333 | 4.046667 | 3.065644 | 7.63E-06 | MTUS2 |
| TCONS_00011156 | 1.073333 | 226.52 | 0.016667 | 2.676667 | 7.327328 | 2.66E-07 | Gria4 |
| TCONS_00011158 | 34.80667 | 482.6633 | 0.5 | 5.796667 | 3.535224 | 0.000364 | Gria4 |
| TCONS_00011532 | 89.13667 | 0 | 1.41 | 0.001 | -10.4615 | 2.92E-06 | MANBAL |
| TCONS_00011672 | 2554.913 | 1055.06 | 34.34333 | 12.26667 | -1.48529 | 1.63E-07 | LINGO1 |
| TCONS_00012005 | 0.01 | 182.82 | 0.001 | 0.783333 | 9.613483 | 7.99E-05 | MYO5A |
| TCONS_00012628 | 0 | 265.7233 | 0.001 | 1.563333 | 10.61041 | 3.84E-11 | TP53BP1 |
| TCONS_00012764 | 0 | 102.37 | 0.001 | 1.273333 | 10.31439 | 0.000578 | scamp5-a |
| TCONS_00013193 | 1742.66 | 857.9533 | 18.10333 | 7.836667 | -1.20794 | 8.39E-06 | SHC4 |
| TCONS_00013445 | 251.5 | 831.6367 | 0.986667 | 2.86 | 1.53538 | 0.000218 | ADAMTS17 |
| TCONS_00013540 | 2055.583 | 981.6733 | 16.3 | 6.946667 | -1.23048 | 1.03E-05 | ITGA11 |
| TCONS_00013628 | 1.583333 | 770.6367 | 0.003333 | 1.94 | 9.184875 | 4.6E-11 | Map1a |
| TCONS_00014649 | 0 | 94.72 | 0.001 | 1.023333 | 9.99906 | 2.83E-05 | GPR56 |
| TCONS_00014650 | 358.84 | 73.70667 | 4.443333 | 0.803333 | -2.46757 | 0.000138 | GPR56 |
| TCONS_00015150 | 3502.287 | 10481.78 | 24.31333 | 62.64333 | 1.365413 | 1.01E-09 | SLC7A5 |
| TCONS_00015222 | 1777.837 | 0 | 10.5 | 0.001 | -13.3581 | 3.46E-52 | ATXN1L |
| TCONS_00015670 | 601.4633 | 239.5667 | 5.913333 | 2.073333 | -1.51202 | 0.001323 | COL7A1 |
| TCONS_00015673 | 499.5567 | 174.4667 | 6.673333 | 2.006667 | -1.73361 | 0.000972 | COL7A1 |
| TCONS_00015678 | 1815.333 | 924.6667 | 37.26333 | 16.85333 | -1.14472 | 2.34E-05 | HIST2H2AB |
| TCONS_00015757 | 0 | 135.15 | 0.001 | 2.053333 | 11.00375 | 1.52E-07 | CCDC51 |
| TCONS_00015954 | 92.83333 | 0 | 0.76 | 0.001 | -9.56986 | 0.000349 | CNTN4 |
| TCONS_00016490 | 0 | 82.73333 | 0.001 | 0.83 | 9.696968 | 0.001135 | DENND6A |
| TCONS_00016630 | 21.33333 | 234.3333 | 0.246667 | 2.303333 | 3.223089 | 0.000248 | FAM107A |
| TCONS_00016655 | 50.32667 | 642.5267 | 0.4 | 4.466667 | 3.481127 | 3.25E-09 | CADPS |
| TCONS_00017181 | 524.5833 | 1448.783 | 3.92 | 9.72 | 1.310103 | 4.57E-05 | STK10 |
| TCONS_00017361 | 1330.477 | 3595.733 | 17.58333 | 41.65 | 1.244108 | 3.96E-06 | TNIP1 |
| TCONS_00017386 | 3463.507 | 1820.883 | 20.29333 | 9.46 | -1.10109 | 4.61E-06 | Pdgfrb |
| TCONS_00017633 | 107.3933 | 0 | 1.746667 | 0.001 | -10.7704 | 0.000203 | ARHGAP26 |
| TCONS_00017944 | 0 | 33.72333 | 0.001 | 0.253333 | 7.984893 | 0.00123 | PPARGC1B |
| TCONS_00017953 | 0 | 39.76 | 0.001 | 0.45 | 8.813781 | 0.00057 | ARHGEF37 |
| TCONS_00018196 | 4336.667 | 11020.67 | 172.17 | 384.0467 | 1.157448 | 6.7E-08 | Gpx3 |
| TCONS_00018282 | 4472.817 | 11178.98 | 61.42333 | 133.69 | 1.122033 | 4.23E-07 | TGFBI |
| TCONS_00018578 | 931.75 | 2313.25 | 10.54 | 22.88 | 1.118212 | 7.28E-06 | Fam20c |
| TCONS_00018814 | 949.6667 | 323.1133 | 16.28667 | 4.996667 | -1.70465 | 6.54E-05 | C1qtnf1 |
| TCONS_00019277 | 218.1767 | 725.0433 | 1.793333 | 5.22 | 1.541406 | 0.000789 | GPRC5B |
| TCONS_00019524 | 230.3933 | 1639.69 | 1.233333 | 7.72 | 2.646038 | 5.74E-05 | ttyh3 |
| TCONS_00019665 | 2659.903 | 1140.58 | 19.76333 | 7.5 | -1.39786 | 2.14E-08 | SREBF1 |
| TCONS_00020023 | 2138.627 | 1154.747 | 11.07667 | 5.286667 | -1.06709 | 5.49E-05 | Crebbp |
| TCONS_00022055 | 603.1967 | 153.9467 | 5.123333 | 1.136667 | -2.17227 | 1.19E-05 | ALAD |
| TCONS_00022080 | 0 | 84.78 | 0.001 | 0.763333 | 9.576169 | 0.000819 | NSMF |
| TCONS_00022519 | 48.16667 | 0 | 0.316667 | 0.001 | -8.30682 | 0.000203 | CNTRL |
| TCONS_00022540 | 44.46333 | 0 | 0.226667 | 0.001 | -7.82443 | 0.0002 | Dab2ip |
| TCONS_00022794 | 431.5767 | 0 | 2.98 | 0.001 | -11.5411 | 2.51E-19 | TNFSF15 |
| TCONS_00023531 | 2.956667 | 442.96 | 0.023333 | 2.89 | 6.952533 | 3.12E-12 | GNA13 |
| TCONS_00023813 | 2324.753 | 1032.307 | 7.416667 | 2.88 | -1.3647 | 1.02E-05 | GAS7 |
| TCONS_00024215 | 2447.447 | 1125.61 | 12.14667 | 4.95 | -1.29506 | 1.48E-05 | BAHCC1 |
| TCONS_00024457 | 178.52 | 17.01 | 2.37 | 0.193333 | -3.61572 | 0.000383 | ELN |
| TCONS_00025310 | 0 | 458.2367 | 0.001 | 1.286667 | 10.32942 | 6.05E-07 | KIAA0100 |
| TCONS_00025337 | 0 | 185.9933 | 0.001 | 2.62 | 11.35535 | 5.75E-05 | FLOT2 |
| TCONS_00025530 | 0 | 505.28 | 0.001 | 3.61 | 11.81778 | 0.000284 | AKAP1 |
| TCONS_00025802 | 3336.81 | 1838.587 | 32.96 | 15.82 | -1.05897 | 1.62E-05 | CSRNP1 |
| TCONS_00026036 | 6100.137 | 2445.81 | 40.74667 | 13.81667 | -1.56027 | 2.66E-08 | NRP1 |
| TCONS_00026270 | 0 | 957.7167 | 0.001 | 5.583333 | 12.44691 | 1.22E-28 | CDK14 |
| TCONS_00026278 | 215.92 | 36.42 | 1.226667 | 0.183333 | -2.7422 | 0.001149 | FZD1 |
| TCONS_00026825 | 538.24 | 159.2033 | 21.47333 | 5.59 | -1.94163 | 0.000102 | Prlh |
| TCONS_00026894 | 1580.863 | 399.8533 | 17.81333 | 3.88 | -2.19883 | 8.72E-08 | ELMO1 |
| TCONS_00028141 | 124.6933 | 553.85 | 0.543333 | 2.153333 | 1.986662 | 0.000299 | PIEZO2 |
| TCONS_00028180 | 245.4733 | 0 | 2.853333 | 0.001 | -11.4784 | 2.09E-05 | Epb41l3 |
| TCONS_00028255 | 0 | 537.1567 | 0.001 | 8.44 | 13.04303 | 1.15E-21 | THOC1 |
| TCONS_00028568 | 965.6367 | 339.69 | 24.22 | 7.27 | -1.73617 | 0.000112 | SDCBP |
| TCONS_00028747 | 1005.123 | 2984.52 | 0.873333 | 2.27 | 1.378088 | 5.63E-07 | - |
| TCONS_00028948 | 890.0967 | 412.0867 | 15.46 | 6.34 | -1.28599 | 0.000474 | OSR2 |
| TCONS_00028949 | 583.3167 | 192.2467 | 10.62 | 3.07 | -1.79047 | 0.000137 | Osr2 |
| TCONS_00029784 | 503.5533 | 1271.04 | 3.476667 | 7.586667 | 1.125761 | 0.000897 | PTPRN2 |
| TCONS_00029833 | 0 | 361.32 | 0.001 | 5.783333 | 12.49769 | 5.77E-06 | IDI1 |
| TCONS_00029842 | 72.04667 | 0 | 0.826667 | 0.001 | -9.69116 | 0.000947 | Pitrm1 |
| TCONS_00029902 | 0 | 152.08 | 0.001 | 0.866667 | 9.759333 | 7.64E-08 | SVIL |
| TCONS_00029935 | 1137.367 | 526.46 | 7.473333 | 3.076667 | -1.28038 | 8.1E-05 | KIAA1462 |
| TCONS_00030247 | 4829.347 | 2718.783 | 12.81333 | 6.356667 | -1.0113 | 0.000246 | CDK6 |
| TCONS_00030575 | 0 | 259.6333 | 0.001 | 2.823333 | 11.46318 | 8.88E-12 | Hacl1 |
| TCONS_00031384 | 231.86 | 0 | 1.103333 | 0.001 | -10.1077 | 2.44E-10 | RNF144B |
| TCONS_00031419 | 570.7067 | 1898.083 | 1.676667 | 4.883333 | 1.54227 | 2.1E-05 | Atxn1 |
| TCONS_00031561 | 0 | 77.2 | 0.001 | 0.313333 | 8.291554 | 2.05E-05 | DSP |
| TCONS_00031725 | 4752.947 | 2092.337 | 19.70667 | 7.28 | -1.43667 | 0.000169 | CDH6 |
| TCONS_00031889 | 0 | 321.3833 | 0.001 | 2.413333 | 11.23681 | 5.04E-06 | GRB10 |
| TCONS_00032017 | 500.2267 | 1974.593 | 2.14 | 7.346667 | 1.779479 | 5.2E-05 | SLC39A6 |
| TCONS_00032266 | 500.2167 | 1214.3 | 3.873333 | 8.27 | 1.094312 | 0.0009 | Cidea |
| TCONS_00033157 | 864.93 | 2451.08 | 3.46 | 8.693333 | 1.329137 | 1.33E-06 | NCALD |
| TCONS_00033384 | 58.93333 | 400.0733 | 0.25 | 1.533333 | 2.616671 | 0.000111 | Samd12 |
| TCONS_00033442 | 91.48667 | 0 | 0.586667 | 0.001 | -9.1964 | 0.0005 | FBXO32 |
| TCONS_00033564 | 898.9733 | 3034.987 | 7.043333 | 20.3 | 1.527149 | 1.87E-07 | ST3GAL1 |
| TCONS_00033621 | 0 | 417.79 | 0.001 | 2.02 | 10.98014 | 2.24E-06 | TRAPPC9 |
| TCONS_00034254 | 0 | 89.11333 | 0.001 | 0.976667 | 9.931722 | 6.72E-06 | CDH4 |
| TCONS_00034367 | 432.4567 | 41.48333 | 8.2 | 0.68 | -3.59202 | 0.000599 | RSPO4 |
| TCONS_00034806 | 105.4533 | 652 | 1.243333 | 6.67 | 2.423474 | 8.51E-06 | Acss2 |
| TCONS_00034810 | 848.8033 | 3274.13 | 9.66 | 33.12667 | 1.777898 | 1.1E-11 | ACSS2 |
| TCONS_00034812 | 5762.133 | 3163.823 | 19.48 | 9.346667 | -1.05947 | 7.46E-07 | SOGA1 |
| TCONS_00034981 | 47.27333 | 0 | 0.933333 | 0.001 | -9.86625 | 0.00015 | GATA5 |
| TCONS_00035019 | 0.666667 | 182.3667 | 0.003333 | 1.08 | 8.33985 | 9.14E-08 | Pxdn |
| TCONS_00035101 | 353 | 87.66667 | 8.166667 | 1.75 | -2.22239 | 0.000509 | FOXS1 |
| TCONS_00035121 | 0 | 80.06 | 0.001 | 0.586667 | 9.196397 | 2.43E-05 | CDK5RAP1 |
| TCONS_00035157 | 71.85 | 0 | 0.676667 | 0.001 | -9.4023 | 2.28E-05 | ELMO2 |
| TCONS_00035430 | 281.1367 | 1274.803 | 3.606667 | 13.70667 | 1.92614 | 1.19E-05 | Slc35e2 |
| TCONS_00035466 | 12154.91 | 6770.493 | 274.9333 | 133.6667 | -1.04044 | 2.94E-07 | MXRA8 |
| TCONS_00035482 | 1884.89 | 778.4067 | 23.87333 | 8.4 | -1.50694 | 8.61E-07 | fam132a |
| TCONS_00035933 | 626.6267 | 1612.317 | 3.196667 | 7.186667 | 1.168754 | 7.99E-05 | RERE |
| TCONS_00036123 | 0 | 227.0533 | 0.001 | 0.496667 | 8.956134 | 2.72E-05 | VPS13D |
| TCONS_00036285 | 47938.7 | 135239.1 | 314.46 | 772.02 | 1.295762 | 2.86E-10 | LOXL2 |
| TCONS_00036321 | 2762.167 | 1482.783 | 33.42667 | 15.64667 | -1.09514 | 0.000107 | N4bp3 |
| TCONS_00036374 | 2722.687 | 708.56 | 25.52 | 6.086667 | -2.0679 | 3.41E-08 | TACC1 |
| TCONS_00036415 | 867.7833 | 394.5867 | 18.56333 | 7.446667 | -1.31779 | 0.000315 | Tmem127 |
| TCONS_00036648 | 815.7733 | 326.24 | 18.76333 | 6.53 | -1.52276 | 0.000594 | PPP3CC |
| TCONS_00037212 | 1167.453 | 4809.9 | 8.533333 | 30.28333 | 1.827343 | 1.14E-10 | Col8a2 |
| TCONS_00037295 | 0 | 60.13333 | 0.001 | 1.216667 | 10.24872 | 0.000163 | ZBTB8A |
| TCONS_00037408 | 1666.063 | 593.7333 | 7.996667 | 2.373333 | -1.75248 | 0.0007 | Arid1a |
| TCONS_00037467 | 289.7567 | 0 | 2.296667 | 0.001 | -11.1653 | 4.92E-06 | PUM1 |
| TCONS_00037507 | 250.3533 | 0 | 2.06 | 0.001 | -11.0084 | 1.26E-10 | EYA3 |
| TCONS_00037567 | 418.81 | 1148.103 | 4.44 | 10.76667 | 1.27794 | 0.000362 | TCEA3 |
| TCONS_00037771 | 1141.16 | 223.37 | 19.83333 | 3.456667 | -2.52047 | 2.34E-10 | TXLNA |
| TCONS_00038377 | 0 | 156.1533 | 0.001 | 3.266667 | 11.6736 | 0.000122 | oaf |
| TCONS_00038427 | 155.26 | 553.1667 | 1.65 | 5.11 | 1.630857 | 0.001362 | CADM1 |
| TCONS_00038823 | 127.4333 | 1.68 | 2.47 | 0.03 | -6.3634 | 0.000296 | ARHGEF11 |
| TCONS_00038845 | 3064.463 | 1618.353 | 35.38 | 16.25333 | -1.1222 | 1.74E-05 | Ubap2l |
| TCONS_00038848 | 200.9033 | 0 | 2.436667 | 0.001 | -11.2507 | 1.51E-05 | Ubap2l |
| TCONS_00038957 | 1791.447 | 970.86 | 60.57667 | 28.71 | -1.07721 | 4.36E-05 | - |
| TCONS_00039679 | 0 | 235.41 | 0.001 | 1.633333 | 10.6736 | 5.92E-11 | CR1 |
| TCONS_00039680 | 213.7233 | 0.956667 | 1.603333 | 0.006667 | -7.90989 | 1.09E-07 | CR1 |
| TCONS_00040253 | 157.75 | 790.05 | 1.113333 | 4.993333 | 2.165118 | 2.84E-06 | SCUBE3 |
| TCONS_00040364 | 2502.987 | 1275.933 | 160.0967 | 73.26 | -1.12785 | 0.000109 | PLP2 |
| TCONS_00040511 | 121.2567 | 0 | 1.066667 | 0.001 | -10.0589 | 0.000197 | MYO1D |
| TCONS_00041613 | 0 | 49.34 | 0.001 | 0.356667 | 8.478433 | 0.000275 | HMHA1 |
| TCONS_00041905 | 464.8933 | 1194.327 | 5.913333 | 13.24333 | 1.163223 | 0.000593 | CERS4 |
| TCONS_00042052 | 135.6533 | 712.4267 | 0.953333 | 4.58 | 2.264295 | 9.98E-05 | ADAMTS10 |
| TCONS_00042258 | 1125.353 | 202.7333 | 6.226667 | 0.903333 | -2.78513 | 2.16E-06 | MYO9B |
| TCONS_00042520 | 0 | 114.05 | 0.001 | 1.206667 | 10.23681 | 0.00044 | PYGB |
| TCONS_00042578 | 30.84667 | 439.2633 | 0.233333 | 2.836667 | 3.603732 | 1.6E-06 | Macrod2 |
| TCONS_00043197 | 0 | 342.18 | 0.001 | 1 | 9.965784 | 5.16E-09 | PTPN14 |
| TCONS_00043448 | 76.72333 | 517.79 | 0.566667 | 3.456667 | 2.608809 | 0.000185 | KCNK17 |
| TCONS_00044579 | 124.5767 | 663.7333 | 1.396667 | 6.403333 | 2.196835 | 3.93E-05 | Vnn1 |
| TCONS_00044584 | 76.02 | 1130.05 | 1.913333 | 25.3 | 3.724977 | 1.67E-16 | Vnn1 |
| TCONS_00046268 | 463.5267 | 1202.187 | 6.183333 | 14.04 | 1.183086 | 0.001062 | ABHD12 |
| TCONS_00046830 | 1561.797 | 398.94 | 6.546667 | 1.506667 | -2.1194 | 4.17E-06 | CENPF |
| TCONS_00047224 | 19.98667 | 350.1267 | 0.243333 | 3.64 | 3.902933 | 8.94E-07 | RASGRP3 |
| TCONS_00047603 | 0 | 52.05667 | 0.001 | 0.75 | 9.550747 | 0.000367 | KIF25 |
| TCONS_00047612 | 1766.73 | 743.1433 | 11.00333 | 3.936667 | -1.48289 | 8.1E-06 | Mllt4 |
| TCONS_00047686 | 207.5433 | 4403.897 | 1.353333 | 25.11333 | 4.213864 | 7.18E-54 | Fndc1 |
| TCONS_00047834 | 0 | 70.59333 | 0.001 | 0.503333 | 8.97537 | 6.28E-05 | Phactr2 |
| TCONS_00047896 | 1123.313 | 275.0533 | 3.916667 | 0.846667 | -2.20976 | 7.43E-05 | HECA |
| TCONS_00048062 | 1.32 | 77.56667 | 0.01 | 0.473333 | 5.564785 | 0.000444 | LAMA2 |
| TCONS_00048309 | 0 | 297.07 | 0.001 | 3.62 | 11.82177 | 3.16E-13 | Rpf2 |
| TCONS_00049387 | 0 | 208.99 | 0.001 | 3.213333 | 11.64985 | 6.24E-05 | Snx17 |
| TCONS_00049465 | 483.9 | 0 | 6.1 | 0.001 | -12.5746 | 0.000196 | HADHA |
| TCONS_00049475 | 65.14667 | 0 | 2.626667 | 0.001 | -11.359 | 7.95E-05 | - |
| TCONS_00049768 | 1417.47 | 508.2033 | 17.22333 | 5.466667 | -1.65563 | 1.45E-07 | Wiz |
| TCONS_00049928 | 904.4733 | 352.84 | 8.866667 | 3.056667 | -1.53643 | 6.16E-05 | CALR |
| TCONS_00050644 | 7108.843 | 2818.04 | 107.2633 | 36.68333 | -1.54796 | 4.05E-11 | EHD2 |
| TCONS_00050645 | 720.07 | 317.5367 | 10.52333 | 4.116667 | -1.35404 | 0.001358 | Ehd2 |
| TCONS_00050647 | 163.4367 | 0.73 | 1.203333 | 0.003333 | -8.49586 | 1.28E-07 | EHD2 |
| TCONS_00050666 | 1223.88 | 606.48 | 16.96333 | 7.513333 | -1.17489 | 0.000428 | AKT2 |
| TCONS_00050703 | 998.6667 | 375.3333 | 22.30667 | 7.47 | -1.57829 | 1.47E-05 | Snrpd2 |
| TCONS_00050781 | 3993.287 | 1865.073 | 44.05667 | 18.10333 | -1.2831 | 2.17E-07 | SMARCA4 |
| TCONS_00051140 | 1159.513 | 666.6 | 27.79333 | 13.84667 | -1.0052 | 0.001064 | Syvn1 |
| TCONS_00051148 | 1889.637 | 1047.23 | 32.98667 | 16.36667 | -1.01112 | 0.000508 | HNRNPUL2 |
| TCONS_00051215 | 243.3067 | 30.19333 | 2.77 | 0.3 | -3.20685 | 0.000414 | Stat2 |
| TCONS_00051621 | 0.003333 | 1061.82 | 0.001 | 5.84 | 12.51175 | 2.65E-08 | LARP4 |
| TCONS_00051749 | 1786.71 | 979.73 | 53.65 | 26.32333 | -1.02724 | 0.000446 | BANF1 |
| TCONS_00051816 | 40.41333 | 0 | 0.953333 | 0.001 | -9.89684 | 0.000691 | MFSD5 |
| TCONS_00052380 | 725.5467 | 0 | 3.046667 | 0.001 | -11.573 | 6.63E-19 | ATP7A |
| TCONS_00052404 | 1373.347 | 196.4533 | 8.276667 | 1.07 | -2.95144 | 3.33E-08 | Capn5 |
| TCONS_00052435 | 11 | 155.3333 | 0.116667 | 1.463333 | 3.648794 | 0.00053 | COL4A6 |
| TCONS_00052771 | 4260.697 | 2333.853 | 12.67 | 6.04 | -1.0688 | 6.04E-06 | PALLD |
| TCONS_00052772 | 107.6233 | 0 | 0.35 | 0.001 | -8.45121 | 0.000289 | PALLD |
| TCONS_00052895 | 0 | 127.24 | 0.001 | 2.86 | 11.4818 | 5.41E-06 | ZNF330 |
| TCONS_00053062 | 0 | 201.8267 | 0.001 | 1.236667 | 10.27224 | 0.001227 | JADE1 |
| TCONS_00053494 | 1614.847 | 834.2867 | 5.976667 | 2.716667 | -1.1375 | 0.00109 | LPHN3 |
| TCONS_00053738 | 4054.043 | 2197.953 | 56.8 | 26.74 | -1.08689 | 1.81E-05 | NDNF |
| TCONS_00054112 | 174.7167 | 665.93 | 0.933333 | 3.09 | 1.727143 | 0.000251 | ATP8A1 |
| TCONS_00054170 | 0 | 63.50333 | 0.001 | 1.053333 | 10.04075 | 0.000103 | Rbm47 |
| TCONS_00054174 | 750.8633 | 2620.567 | 6.276667 | 18.33667 | 1.546661 | 0.000185 | PDS5A |
| TCONS_00054256 | 0 | 87.92333 | 0.001 | 0.756667 | 9.563514 | 1.12E-05 | sepsecs |
| TCONS_00054646 | 2525.703 | 1089.837 | 59.61 | 22.15333 | -1.42803 | 2.51E-07 | Atoh8 |
| TCONS_00054866 | 5255.497 | 2521.297 | 32.54333 | 13.37667 | -1.28264 | 4.58E-06 | EDA2R |
| TCONS_00054935 | 193.8267 | 0.023333 | 1.326667 | 0.001 | -10.3736 | 0.00095 | Bcorl1 |
| TCONS_00055334 | 3.383333 | 168.4 | 0.03 | 1.156667 | 5.268867 | 0.000549 | KLF5 |
| TCONS_00055848 | 68.42667 | 0 | 0.37 | 0.001 | -8.53138 | 2.68E-05 | INPP4B |
| TCONS_00056353 | 1881.643 | 147.8333 | 11.6 | 0.806667 | -3.84601 | 0.000971 | AFF1 |
| TCONS_00056992 | 58.85333 | 355.1367 | 1.596667 | 8.59 | 2.427595 | 0.000467 | CWH43 |
| TCONS_00057146 | 204.3633 | 851.6433 | 1.203333 | 4.406667 | 1.872651 | 0.000883 | PCDH9 |
| TCONS_00057147 | 0 | 204.97 | 0.001 | 1.073333 | 10.06788 | 5.13E-10 | PCDH9 |
| TCONS_00057746 | 1294.507 | 3323.123 | 5.983333 | 13.51 | 1.175006 | 1.71E-05 | DYSF |
| TCONS_00057778 | 1583.147 | 706 | 30.07333 | 11.95333 | -1.33107 | 5.45E-06 | Dbn1 |
| TCONS_00057825 | 1031.6 | 458.9667 | 5.816667 | 2.29 | -1.34485 | 0.001152 | ZNF638 |
| TCONS_00057926 | 427.7533 | 1117.333 | 2.45 | 5.7 | 1.21818 | 0.00062 | MYRF |
| TCONS_00058008 | 172.37 | 0 | 1.996667 | 0.001 | -10.9634 | 4.08E-05 | IGHMBP2 |
| TCONS_00058294 | 1373.537 | 146.3567 | 15.06333 | 1.303333 | -3.53076 | 3.05E-05 | DENND5A |
| TCONS_00058535 | 0.12 | 190.77 | 0.001 | 0.563333 | 9.137845 | 0.000133 | LRP5 |
| TCONS_00058787 | 147.9033 | 0 | 0.613333 | 0.001 | -9.26053 | 1.74E-06 | TSPAN18 |
| TCONS_00059007 | 1.123333 | 199.1633 | 0.01 | 1.41 | 7.139551 | 1.32E-05 | ZFYVE1 |
| TCONS_00059551 | 2004.55 | 892.8633 | 28.88333 | 11.59667 | -1.31653 | 0.000129 | - |
| TCONS_00059778 | 78.1 | 0.123333 | 1.456667 | 0.003333 | -8.77149 | 7E-06 | TRAF3 |
| TCONS_00059996 | 44.06333 | 418.58 | 1 | 8.453333 | 3.07952 | 7.65E-06 | - |
| TCONS_00061231 | 280.8567 | 1195.333 | 12 | 45.54 | 1.9241 | 9.3E-07 | RIHB |
| TCONS_00062103 | 0.26 | 84.13333 | 0.01 | 1.986667 | 7.634206 | 3.95E-05 | FOXN3 |
| TCONS_00062352 | 658.8467 | 2348.827 | 17.79 | 56.92333 | 1.677954 | 1.13E-06 | CKB |
| TCONS_00062404 | 4103.46 | 1537.09 | 12.45 | 4.2 | -1.56768 | 0.000216 | AHNAK2 |
| TCONS_00062633 | 296.5933 | 1138.423 | 2.88 | 9.823333 | 1.770144 | 1.66E-06 | PELI2 |
| TCONS_00062713 | 69.15333 | 0 | 0.686667 | 0.001 | -9.42347 | 1.79E-05 | Trim9 |
| TCONS_00062721 | 1581.27 | 4294.047 | 13.49333 | 31.20333 | 1.209453 | 0.000305 | NID2 |
| TCONS_00062860 | 0 | 395.5167 | 0.001 | 1.26 | 10.29921 | 1.33E-15 | CCSER2 |
| TCONS_00063042 | 134.6533 | 0 | 1.093333 | 0.001 | -10.0945 | 6.69E-05 | RTKN2 |
| TCONS_00063077 | 681.5533 | 1821.51 | 4.84 | 11.26667 | 1.218982 | 1.51E-05 | Ank3 |
| TCONS_00063259 | 0 | 144.59 | 0.001 | 4.186667 | 12.03159 | 7.81E-08 | Spock2 |
| TCONS_00063855 | 1201.23 | 562.59 | 7.393333 | 3.046667 | -1.27899 | 0.000152 | PDCD11 |
| TCONS_00064957 | 740.7433 | 1726.04 | 8.52 | 17.38667 | 1.029056 | 0.000185 | ALOX5 |
| TCONS_00064963 | 0 | 307.31 | 0.001 | 1.693333 | 10.72565 | 3.69E-13 | 44263 |
| TCONS_00065524 | 92.69333 | 0 | 1.073333 | 0.001 | -10.0679 | 3.25E-06 | MCMBP |
| TCONS_00066417 | 30.93667 | 0 | 0.116667 | 0.001 | -6.86625 | 0.000872 | Lrp2 |
| TCONS_00066564 | 0 | 133.1167 | 0.001 | 0.95 | 9.891784 | 0.000211 | ATG9A |
| TCONS_00067508 | 1380.173 | 690.4867 | 8.096667 | 3.606667 | -1.16666 | 0.000388 | SDPR |
| TCONS_00067593 | 10.88667 | 562.28 | 0.056667 | 2.386667 | 5.396353 | 5.55E-05 | PLCL1 |
| TCONS_00068356 | 0 | 38.16333 | 0.001 | 0.096667 | 6.594947 | 0.000646 | LRP1B |
| TCONS_00068899 | 474.3333 | 1164.333 | 3.546667 | 7.66 | 1.110881 | 0.000861 | LAMC2 |
| TCONS_00069209 | 1253.447 | 699.73 | 15.01 | 7.433333 | -1.01384 | 0.000674 | SYDE2 |
| TCONS_00069210 | 0 | 151.9533 | 0.001 | 1.97 | 10.94398 | 0.000127 | SYDE2 |
| TCONS_00069479 | 37.31 | 0 | 0.313333 | 0.001 | -8.29155 | 0.000519 | Elavl4 |
| TCONS_00070041 | 1120.047 | 318.0967 | 45.96667 | 11.56 | -1.99145 | 1.23E-08 | Crip2 |
| TCONS_00070136 | 1873.977 | 769.34 | 13.28667 | 4.77 | -1.47792 | 0.00058 | Pbx1 |
| TCONS_00070234 | 1135.897 | 167.18 | 6.486667 | 0.843333 | -2.9433 | 1.66E-09 | PAPPA2 |
| TCONS_00070813 | 0.19 | 430.8233 | 0.001 | 1.783333 | 10.80036 | 0.000795 | FAF1 |
| TCONS_00070960 | 182.4033 | 0 | 1.326667 | 0.001 | -10.3736 | 3.58E-05 | KANK4 |
| TCONS_00071081 | 0 | 69.34 | 0.001 | 1.363333 | 10.41292 | 4.5E-05 | PCCB |
| TCONS_00071083 | 2612.573 | 783.6467 | 27.69 | 7.053333 | -1.97299 | 0.000623 | - |
| TCONS_00071370 | 222.4367 | 1563.92 | 0.716667 | 4.25 | 2.568089 | 3.27E-07 | CLSTN2 |
| TCONS_00071424 | 1148.667 | 3043.667 | 11.32 | 26.31667 | 1.217103 | 3.53E-06 | KCNE4 |
| TCONS_00071862 | 76.03667 | 0 | 0.57 | 0.001 | -9.15482 | 0.000796 | Eif4g1 |
| TCONS_00072417 | 239.76 | 1180.287 | 1.5 | 6.64 | 2.146221 | 1.12E-05 | - |
| TCONS_00072865 | 19.11 | 768.7567 | 0.56 | 19.43333 | 5.116963 | 3.05E-17 | OSTN |
| TCONS_00072998 | 286.9367 | 909.14 | 2.613333 | 7.34 | 1.489889 | 0.000327 | chrd |
| TCONS_00073071 | 478.05 | 1212.097 | 6.653333 | 15.32333 | 1.203581 | 0.001171 | Fxr1 |
| TCONS_00073175 | 558.7133 | 0.046667 | 1.823333 | 0.001 | -10.8324 | 2.6E-05 | FNDC3B |
| TCONS_00073524 | 1437.267 | 805.4567 | 36.76 | 17.71 | -1.05357 | 0.000482 | HINT1 |
| TCONS_00074590 | 0 | 150.2867 | 0.001 | 0.92 | 9.84549 | 5.82E-08 | - |
| TCONS_00074591 | 0.333333 | 327.7133 | 0.003333 | 2.84 | 9.73471 | 1.97E-13 | - |
| TCONS_00074643 | 0 | 80.57333 | 0.001 | 1.09 | 10.09011 | 1.89E-05 | Galt |
| TCONS_00074684 | 1158.383 | 4002.423 | 60.41 | 185.4067 | 1.617834 | 4.72E-05 | AVD |
| TCONS_00074685 | 817.2833 | 2207.577 | 83.24333 | 204.77 | 1.298598 | 0.000259 | AVD |
| TCONS_00074688 | 15314 | 6257 | 360.4933 | 128.29 | -1.49056 | 1.8E-09 | Tpm3 |
| TCONS_00074856 | 565.13 | 2526.71 | 5.813333 | 22.51 | 1.953129 | 2.53E-12 | C7 |
| TCONS_00075670 | 627.8767 | 109.7667 | 3.953333 | 0.583333 | -2.76068 | 1.46E-06 | KANK1 |
| TCONS_00075685 | 3742.19 | 1465.727 | 27.94667 | 9.916667 | -1.49475 | 1.02E-07 | SMARCA2 |
| TCONS_00075997 | 60.46667 | 573.9267 | 0.23 | 1.926667 | 3.066401 | 2.63E-07 | ADAMTSL1 |
| TCONS_00076556 | 825 | 353.3333 | 5.02 | 1.9 | -1.40169 | 0.001168 | EPB41L4A |
| TCONS_00076860 | 147.2133 | 0 | 0.803333 | 0.001 | -9.64985 | 7.42E-05 | HOOK3 |
| TCONS_00077426 | 0 | 155.4033 | 0.001 | 0.986667 | 9.946419 | 0.000134 | ACO1 |
| TCONS_00077538 | 0 | 270.1533 | 0.001 | 3.88 | 11.92184 | 0.000986 | ALDH7A1 |
| TCONS_00077680 | 0.113333 | 498.9967 | 0.001 | 2.173333 | 11.08569 | 9.33E-05 | ZBTB5 |
| TCONS_00077752 | 61.27333 | 0 | 2.71 | 0.001 | -11.4041 | 0.000202 | TCF4 |
| TCONS_00077802 | 2179.647 | 1214.47 | 16.75 | 8.18 | -1.03399 | 0.00036 | LIPG |
| TCONS_00077810 | 177.5467 | 0 | 1.28 | 0.001 | -10.3219 | 8.09E-05 | CTIF |
| TCONS_00078412 | 1906.333 | 662.8033 | 19.31333 | 6.106667 | -1.66114 | 3.01E-05 | DAB2 |
| TCONS_00078457 | 0.003333 | 466.5267 | 0.001 | 5.63 | 12.45892 | 5.59E-19 | Paip1 |
| TCONS_00078538 | 376.4367 | 1145.357 | 2.113333 | 5.586667 | 1.402467 | 6.71E-05 | CSPG4 |
| TCONS_00078545 | 1127.333 | 2818.667 | 7.163333 | 15.81333 | 1.142439 | 5.78E-05 | PPAP2A |
| TCONS_00078853 | 705.08 | 3184.41 | 5 | 19.96333 | 1.997353 | 5.42E-10 | IQGAP2 |
| TCONS_00079292 | 0 | 496.58 | 0.001 | 1.32 | 10.36632 | 0.000209 | MPDZ |
| TCONS_00079599 | 536.85 | 1673.67 | 5.976667 | 15.62667 | 1.386597 | 0.001039 | KLF9 |
| TCONS_00079666 | 1926.55 | 896.7933 | 8.216667 | 3.413333 | -1.26737 | 2.06E-05 | PRUNE2 |
| TCONS_00080094 | 0 | 47.62667 | 0.001 | 0.74 | 9.531381 | 0.000281 | - |
| TCONS_00080537 | 453.7867 | 1705.863 | 1.693333 | 5.55 | 1.712622 | 1.24E-08 | FBN2 |
| TCONS_00080538 | 169.5467 | 1384.47 | 0.63 | 4.5 | 2.836501 | 3.11E-13 | FBN2 |
| TCONS_00080693 | 0.176667 | 403.2567 | 0.003333 | 3.973333 | 10.21917 | 0.000114 | RNF20 |
| TCONS_00080788 | 55.47333 | 380.45 | 0.513333 | 3.003333 | 2.548597 | 0.000933 | CORO2A |
